# Supplementary material for: Bacteroides expand the functional versatility of a conserved transcription factor and transcribed DNA to program capsule diversity
Source: Springer Nature journal article supplement (doi:10.1038/s41467-024-55215-9), 2024-12-30
Supplement: MOESM1 [file 41467_2024_55215_MOESM1_ESM.pdf › 41467_2024_55215_MOESM1_ESM.pdf]

## Supplementary Information

### ***Bacteroides* expand the functional versatility of a conserved transcription factor and transcribed DNA to program capsule diversity**

Jason Saba<sup>1,2</sup>, Katia Flores<sup>3,4</sup>, Bailey Marshall<sup>1,5</sup>, Michael D. Engstrom<sup>1</sup>, Yikai Peng<sup>1</sup>, Atharv S. Garje<sup>1,6</sup>, Laurie E. Comstock<sup>3,4</sup>, Robert Landick<sup>1,7,\*</sup>

Author affiliations: <sup>1</sup>Department of Biochemistry, University of Wisconsin–Madison, Madison, WI 53706, USA. <sup>2</sup>Microbiology Doctoral Training Program, University of Wisconsin–Madison, Madison, WI 53706, USA. <sup>3</sup>Department of Microbiology, University of Chicago, Chicago, IL, 60637, USA. <sup>4</sup>Duchossois Family Institute, University of Chicago, Chicago, IL 60637, USA. <sup>5</sup>Cell and Molecular Biology Training Program, University of Wisconsin–Madison, Madison, WI 53706, USA. <sup>6</sup>Genetics Training Program, University of Wisconsin–Madison, Madison, WI 53706, USA. <sup>7</sup>Department of Bacteriology, University of Wisconsin–Madison, Madison, WI 53706, USA

This PDF file includes:

#### 1. Tables

|                                                  |      |
|--------------------------------------------------|------|
| Table S1. Oligonucleotides used in this study    | pS3  |
| Table S2. <i>B. fragilis</i> strain construction | pS12 |
| Table S3. Plasmids used in this study            | pS14 |
| Table S4. Strains used in this study             | pS17 |

#### 2. Supplementary Figures

|                                                                                                                                                               |      |
|---------------------------------------------------------------------------------------------------------------------------------------------------------------|------|
| Supplementary Fig. 1. <i>ops<sub>X</sub></i> pauses found by NET-seq                                                                                          | pS18 |
| Supplementary Fig. 2. <i>ops<sub>X</sub></i> pause mapping by PIVoT                                                                                           | pS19 |
| Supplementary Fig. 3. Mapping <i>ops<sub>X</sub></i> sites by quantitative comparison to MspI–digested ladders or sequencing ladders created by limiting NTPs | pS20 |
| Supplementary Fig. 4. Y <sub>X</sub> and NusA effects at 6 different <i>ops<sub>X</sub></i> sites                                                             | pS21 |
| Supplementary Fig. 5. Y <sub>F</sub> outcompetes NusG at <i>ops<sub>F</sub></i>                                                                               | pS22 |
| Supplementary Fig. 6. Confidence metrics from AlphaFold 3 Y <sub>E</sub> -Z <sub>A</sub> complex structural prediction                                        | pS23 |
| Supplementary Fig. 7. Effects of Y <sub>E</sub> and Y <sub>A</sub> on WT <i>ops<sub>X</sub></i> and hybrid <i>ops<sub>X</sub></i> sequences in PIVoT assays   | pS24 |
| Supplementary Fig. 8. Y <sub>X</sub> alignment compared to NusGs and orthologous factors                                                                      | pS25 |
| Supplementary Fig. 9. Predicted secondary structures of nascent RNA hairpins.                                                                                 | pS26 |
| Supplementary Fig. 10. Effects of <i>ops<sub>E</sub></i> mutants on Y <sub>E</sub> or NusA activity                                                           | pS27 |
| Supplementary Fig. 11. WT <i>ops<sub>X</sub></i> sequences and variants used for Fig. 5e                                                                      | pS28 |

|                                                                                                                                                                                              |      |
|----------------------------------------------------------------------------------------------------------------------------------------------------------------------------------------------|------|
| Supplementary Fig. 12. Primary data associated with Fig 6b                                                                                                                                   | pS29 |
| Supplementary Fig. 13. Primary data associated with Fig 6c.                                                                                                                                  | pS30 |
| Supplementary Fig. 14. Modeling of Class 1 Y <sub>x</sub> suggest that Y <sub>x</sub> provides a larger positively charged surface for usDNA interaction relative to RfaH ( <i>E. coli</i> ) | pS31 |
| Supplementary Fig. 15. The PSE monoclonal antibody (mAb 16) is specific to PSE                                                                                                               | pS32 |
| Supplementary Fig. 16. Nucleic scaffolds used in PIVoT and footprinting assays.                                                                                                              | pS33 |
| 3. Supplementary References                                                                                                                                                                  | pS42 |

**Table S1 – Oligonucleotides**

| Oligo    | Sequence (5'-3')                                                                                                                                                                                                                   | Length (nt) | Purpose/Scaffold               |
|----------|------------------------------------------------------------------------------------------------------------------------------------------------------------------------------------------------------------------------------------|-------------|--------------------------------|
| JS145_T  | CGTCACGAGTAGTAAGCTCCTGATCCTTACGGGTACGGGCAGCGAA<br>CCAATATTCTTGTTGTTGAGACATTTAGAAGGATATATTCCTGAGTG<br>ATTTACTTAAGTCCGGGTATGCTTCGCAGTTGGGTGAGACTCTTTTTC<br>TCAGCCAACTGCAAGATTTTTTATGACTTATTTTAGGTGGAAACGA<br>ACGGATTTCGATC           | 200         | PIVoT PSE<br>ultramer scaffold |
| JS146_R  | UUUUAACGUUCCAC                                                                                                                                                                                                                     | 15          | PIVoT various<br>scaffolds     |
| JS147_NT | GATCGAATCCGTTA <u>ACCGATCT</u> CTAAAATAAGTCATAAAAAATCTTG<br>CAGTTTGGCTGAGAAAAAGAGTCTCACCCAACCTGCGAAGCATACCC<br>GGACTTAAGTAAATCACTCAGGAATATATCCTTCTAAATGTCTCAAC<br>AACAAGAATATTGGTTCGCTGCCCGTACCCGTAAGGATCAGGAGCT<br>TACTACTCGTGACG | 200         | PIVoT PSE<br>ultramer scaffold |
| JS510_NT | GCACTGAATTTTTCATTAAAATCATAGAGAAATAACTTG <u>ACCGGGA</u><br><u>GGTATGCTTCGCTACTCCGGT</u> GTCCCCAAAGAACATCCTGACGTGAA<br>CGACATGACAACATCCGCATCTATCGAATCTTCGATG                                                                         | 130         | PIVoT PSF<br>ultramer scaffold |
| JS511_T  | CATCGAAGATTCGATAGATGCGGATGTTGTCATGTCGTTTCACGTCAG<br>GATGTTCTTTGGGGACACCGGAGTAGCGAAGCATACCTCCCGGTCA<br>AGTTATGTAATGCGGATTTTAATGAAAAATTCAGTGC                                                                                        | 130         | PIVoT PSF<br>ultramer scaffold |
| JS191_R  | UUUUUCCGCAUAC                                                                                                                                                                                                                      | 15          | PIVoT PSF<br>ultramer scaffold |
| JS708_NT | GATCGAATCCGTTAACCGATCTGTTCAAATCCGGTGCGAATACTTTT<br>TCTGTACCCGATTATCATAAACTTAATTTGTAAATTGCTGAAAATA<br>AGGCATGTTTTTTGAATATTCCTGTTTTTAACAAATTTTCATCCTTAG                                                                              | 200         | PIVoT PSC<br>ultramer scaffold |

|                        |                                                                                                                                                                                                          |     |                                                                 |
|------------------------|----------------------------------------------------------------------------------------------------------------------------------------------------------------------------------------------------------|-----|-----------------------------------------------------------------|
|                        | TCATTACTGAAACTTTTTCTTACGAACGTAGTCTTGGAGACAACAGATAGCGATAAAC                                                                                                                                               |     |                                                                 |
| JS709_T                | GTTTATCGCTATCTGTTGTCTCCAAGACTACGTTCGTAAGAAAAAGTTTCAGTAATGACTAAGGATGAAAATTTGTTAAAAACAGGAATATTCAAAAACATGCCTTATTTTCAGCAATTTACAAATTAAGTTTTATGATAATCGGGTACAGAAAAAGTATTCGCACCGGATTTGAACGTGGAAACGAACGGATTTCGATC | 200 | PIVoT PSC ultramer scaffold                                     |
| JS551_NT_opsB (+escHP) | GTCCGTTTCGTTTCCACGAATTTGACGGTTTGAAAGAGAAAAGATGTC TCGTTCAAAC <u>CCGCGAAGCGCA</u> CCCGAAATAAAGGAAAATTTCC                                                                                                   | 90  | opsB with pause and escape hp (reconstitute upstream of RNA hp) |
| JS552_T_opsB(+escHP)   | GGAAATTTTCCTTTATTTTCGGGTGCGCTTCGCGGTTTGAACGAGACATCTTTTCTCTTCAAACCGTCAAATTCGTGGAAACGAACGGAC                                                                                                               | 90  | opsB with pause and escape hp (reconstitute upstream of RNA hp) |
| JS553_NT_opsA (+escHP) | GTCCGTTTCGTTTCCACGTCTTACGGTTTGAATGGGAAAAGATGTCTC GTCCAAAC <u>CCGCGTAGCGCA</u> CCCGAAAGTAACCTCTCGACTTTG                                                                                                   | 90  | opsA with pause and escape hp (reconstitute upstream of RNA hp) |
| JS554_T_opsA(+escHP)   | CAAAGTCGAGAGGTTACTTTTCGGGTGCGCTACGCGGTTTGGACGAGACATCTTTTCCCATTCAAACCGTAAGACGTGGAAACGAACGGAC                                                                                                              | 90  | opsA with pause and escape hp (reconstitute upstream of RNA hp) |

|               |                                                                                                                          |    |                                                                       |
|---------------|--------------------------------------------------------------------------------------------------------------------------|----|-----------------------------------------------------------------------|
| JS521_NT_opsE | GTCCGTTTCGTTTCCACGATCTTGCAGTTTGGCTGAGAAAAAGAGTCT<br>CACCCA <u>ACTGCGAAGCATA</u> CCCGGACTTAAGTAAATCACTCAG                 | 90 | opsE with pause<br>hairpin<br>(reconstitute<br>upstream of RNA<br>hp) |
| JS522_T_opsE  | CTGAGTGATTTACTTAAGTCCGGGTATGCTTCGCAGTTGGGTGAGAC<br>TCTTTTCTCAGCCAAACTGCAAGATCGTGGAACGAACGGAC                             | 90 | opsE with pause<br>hairpin<br>(reconstitute<br>upstream of RNA<br>hp) |
| JS523_NT_opsF | GTCCGTTTCGTTTCCACGTAACCTG <u>ACCGGGAGGTATGCTTCGCTACT</u><br><u>CCGGTGTCCCCA</u> AAGAA <u>CAT</u> CCTGACGTGAACGACATGACAAC | 90 | opsF with pause<br>hairpin<br>(reconstitute<br>upstream of RNA<br>hp) |
| JS524_T_opsF  | GTTGTCATGTCGTTTCACGTCAGGATGTTCTTTGGGGACACCGGAGTA<br>GCGAAGCATACCTCCCGGTCAAGTTACGTGGAACGAACGGAC                           | 90 | opsF with pause<br>hairpin<br>(reconstitute<br>upstream of RNA<br>hp) |
| JS583_NT_opsH | GTCCGTTTCGTTTCCACGTCACCTGACCGGGAGGTACTTTCGTACTCC<br>GGTGT <u>CCCCAAAGAACAT</u> CCTTTTGTGAAGGAATCCCCAGAGC                 | 90 | opsH with pause<br>hairpin<br>(reconstitute<br>upstream of RNA<br>hp) |
| JS584_T_opsH  | GCTCTGGGGATTCTTTCACAAAAGGATGTTCTTTGGGGACACCGGAG<br>TACGAAAGTACCTCCCGGTCAGGTGACGTGGAACGAACGGAC                            | 90 | opsH with pause<br>hairpin<br>(reconstitute                           |

|                    |                                                                                                          |    |                                                                    |
|--------------------|----------------------------------------------------------------------------------------------------------|----|--------------------------------------------------------------------|
|                    |                                                                                                          |    | upstream of RNA hp)                                                |
| JS540_PSE-asDNA_6  | CTGCAAGATCGTGGA                                                                                          | 15 | asDNAs to probe extent of RNA hairpin in PSE                       |
| JS541_PSE-asDNA_7  | ACTGCAAGATCGTGG                                                                                          | 15 | asDNAs to probe extent of RNA hairpin in PSE                       |
| JS542_PSE-asDNA_8  | AACTGCAAGATCGTG                                                                                          | 15 | asDNAs to probe extent of RNA hairpin in PSE                       |
| JS543_PSE-asDNA_9  | AAACTGCAAGATCGT                                                                                          | 15 | asDNAs to probe extent of RNA hairpin in PSE                       |
| JS544_PSE-asDNA_10 | CAAACCTGCAAGATCG                                                                                         | 15 | asDNAs to probe extent of RNA hairpin in PSE                       |
| JS545_PSE-asDNA_11 | CCAAACTGCAAGATC                                                                                          | 15 | asDNAs to probe extent of RNA hairpin in PSE                       |
| JS566_PSE-asDNA_17 | GTGCTAGAACGTCAAACCGACTCT                                                                                 | 24 | negative control asDNA                                             |
| JS555_NT           | GTCCGTTTCGTTTCCACGTCTTACGGTTTGAATGGGAAAAGATGTCTC<br>GTCCAA <u>ACTGCGAAGCATA</u> CCCGAAAGTAACCTCTCGACTTTG | 90 | HP <sub>A</sub> ,[-10:-1] <sub>E</sub><br>(Pause Cycling Observed) |

|                                       |                                                                                                       |    |                                                                    |
|---------------------------------------|-------------------------------------------------------------------------------------------------------|----|--------------------------------------------------------------------|
| JS556_T                               | CAAAGTCGAGAGGTTACTTTTCGGGTATGCTTCGCAGTTTGGACGAGACATCTTTTCCCATTCAAACCGTAAGACGTGGAAACGAACGGAC           | 90 | HP <sub>A</sub> ,[-10:-1] <sub>E</sub><br>(Pause Cycling Observed) |
| JS557_NT                              | GTCCGTTTCGTTTCCACGATCTTGCAGTTTGGCTGAGAAAAAGAGTCTCACCCAACCGCGTAGCGCACCCGGACTTAAGTAAATCACTCAG           | 90 | HP <sub>E</sub> ,[-10:-1] <sub>A</sub><br>(Pause Cycling Observed) |
| JS558_T                               | CTGAGTGATTTACTTAAGTCCGGGTGCGCTACGCGGTTGGGTGAGACTCTTTTTTCTCAGCCAAACTGCAAGATCGTGGAACGAACGGAC            | 90 | HP <sub>E</sub> ,[-10:-1] <sub>A</sub><br>(Pause Cycling Observed) |
| JS591_NT                              | GTCCGTTTCGTTTCCACGATCTTGCAGTTTGGCTGAGAAAAAGAGTCTCACCCAAC <u>TGCGtAGCATA</u> CCCGGACTTAAGTAAATCACTCAG  | 90 | -6 opsE>opsA                                                       |
| JS592_T                               | CTGAGTGATTTACTTAAGTCCGGGTATGCTaCGCAGTTGGGTGAGACTCTTTTTTCTCAGCCAAACTGCAAGATCGTGGAACGAACGGAC            | 90 | -6 opsE>opsA                                                       |
| JS593_NT_mut<br>opsE+hp -1,-2,-10     | GTCCGTTTCGTTTCCACGATCTTGCAGTTTGGCTGAGAAAAAGAGTCTCACCCAAC <u>CcGCGAAGCgcA</u> CCCGGACTTAAGTAAATCACTCAG | 90 | opsE+hp > -10:1<br>opsB                                            |
| JS594_T_mut<br>opsE+hp -1,-2,-10      | CTGAGTGATTTACTTAAGTCCGGGTgcGCTTCGCgGTTGGGTGAGACTCTTTTTTCTCAGCCAAACTGCAAGATCGTGGAACGAACGGAC            | 90 | opsE+hp > -10:1<br>opsB                                            |
| JS595_NT_mut<br>opsE+hp -1,-2,-10,-14 | GTCCGTTTCGTTTCCACGATCTTGCAGTTTtGCTGAGAAAAAGAGTCTCACCaAAC <u>CcGCGAAGCgcA</u> CCCGGACTTAAGTAAATCACTCAG | 90 | opsE+hp > -10:1,<br>-14:-36 opsB                                   |
| JS596_T_mut<br>opsE+hp -1,-2,-10,-14  | CTGAGTGATTTACTTAAGTCCGGGTgcGCTTCGCgGTTtGGTGAGACTCTTTTTTCTCAGCaAAACTGCAAGATCGTGGAACGAACGGAC            | 90 | opsE+hp > -10:1,<br>-14:-36 opsB                                   |

|                                                                               |                                                                                                 |    |                                                                                   |
|-------------------------------------------------------------------------------|-------------------------------------------------------------------------------------------------|----|-----------------------------------------------------------------------------------|
| JS597_NT_mut<br>opsE+hp -1,-2,-10,insert U-A                                  | GTCCGTTTCGTTTCCACGATCTTGCAGTTTGGCTGAGAAAAAGAGTCT<br>CACCCAAaCcGCGAAGCgcACCCGGACTTAAGTAAATCACTCA | 90 | opsE+hp > -10:1,<br>-14 ins opsB                                                  |
| JS598_T_mut<br>opsE+hp -1,-2,-10,insert U-A                                   | TGAGTGATTTACTTAAGTCCGGGTgcGCTTCGCgGtTTGGGTGAGACT<br>CTTTTCTCAGCCAAACTGCAAGATCGTGGAACGAACGGAC    | 90 | opsE+hp > -10:1,<br>-14 ins opsB                                                  |
| JS599_NT_mut<br>opsE+hp -1,-2,-10,insert U-A,<br>change var<br>pairing region | GTCCGTTTCGTTTCCACGATCTTGCAGTTTGaaaGAGAAAAAGAGTCTC<br>gttCAAaCcGCGAAGCgcACCCGGACTTAAGTAAATCACTCA | 90 | opsE+hp > -10:1,<br>-14 ins, -36:-34, -<br>18:-16 opsB                            |
| JS600_T_mut<br>opsE+hp -1,-2,-10,insert U-A,<br>change var<br>pairing region  | TGAGTGATTTACTTAAGTCCGGGTgcGCTTCGCgGtTTGaacGAGACTCT<br>TTTTCTCtttCAAACCTGCAAGATCGTGGAACGAACGGAC  | 90 | opsE+hp > -10:1,<br>-14 ins, -36:-34, -<br>18:-16 opsB                            |
| JS672_NT                                                                      | GTCCGTTTCGTTTCCACGATCTTGCAGTTTGaaaGAGAAAagatGTCTCgtt<br>CAAaCcGCGAAGCgcACCCGGACTTAAGTAAATCACTCA | 90 | opsE+hp ><br>(mostly opsB<br>now) -14 ins, -<br>36:-34, -18:-16, -<br>26:-24 opsB |
| JS673_T                                                                       | TGAGTGATTTACTTAAGTCCGGGTgcGCTTCGCgGtTTGaacGAGACatcT<br>TTTCTCtttCAAACCTGCAAGATCGTGGAACGAACGGAC  | 90 | opsE+hp ><br>(mostly opsB<br>now) -14 ins, -<br>36:-34, -18:-16, -<br>26:-24 opsB |



|                         |                                                                                                |    |                                                                                              |
|-------------------------|------------------------------------------------------------------------------------------------|----|----------------------------------------------------------------------------------------------|
| JS674_NT                | GTCCGTTTCGTTTCCACGATCTTGCAGTTTGaaaGAGAAAagatGTCTCggt<br>CAAaCcGCGAAGCgcACCCGaaataaaggaaaattccc | 90 | opsE+hp > (opsB-<br>escape hairpin) -14<br>ins, -36:-34, -18:-<br>16, -26:-24,<br>dsDNA opsB |
| JS675_T                 | gggaaatttcctttatttCGGGTgcGCTTCGCgGtTTGaacGAGACatcTTTTCTCtttC<br>AAACTGCAAGATCGTGGAACGAACGGAC   | 90 | opsE+hp > (opsB-<br>escape hairpin) -14<br>ins, -36:-34, -18:-<br>16, -26:-24,<br>dsDNA opsB |
| JS666_R_opsB-3          | UUUUUCCGCGAAGC                                                                                 | 15 | opsB-hp<br>(reconstitute -3)                                                                 |
| JS654_NT_opsB           | TTTGAAAGAGAAAAGATGTCTCGTTCAAACCGCGAAGCGCACCCGA<br>AATAAAGGAAAATTTCCCAAG                        | 68 | opsB-hp<br>(reconstitute -3)                                                                 |
| JS655_T_opsB            | CTTGGGGAAATTTTCCTTTATTTTCGGGTGCGCTTCGCGGTTTGAACG<br>AGACATCTTTTCTCTTTCAA                       | 68 | opsB-hp<br>(reconstitute -3)                                                                 |
| JS660_NT_opsB<br>-36-34 | TTTGggcGAGAAAAGATGTCTCGTTCAAACCGCGAAGCGCACCCGAA<br>ATAAAGGAAAATTTCCCAAG                        | 68 | opsB -36-34 mut<br>to opsE                                                                   |
| JS661_T_opsB-<br>36-34  | CTTGGGGAAATTTTCCTTTATTTTCGGGTGCGCTTCGCGGTTTGAACG<br>AGACATCTTTTCTCgccCAA                       | 68 | opsB -36-34 mut<br>to opsE                                                                   |
| JS662_NT_opsB<br>-26-24 | TTTGAAAGAGAAAAaAgGTCTCGTTCAAACCGCGAAGCGCACCCGAA<br>ATAAAGGAAAATTTCCCAAG                        | 68 | opsB -26-24 mut<br>to opsE                                                                   |
| JS663_T_opsB-<br>26-24  | CTTGGGGAAATTTTCCTTTATTTTCGGGTGCGCTTCGCGGTTTGAACG<br>AGACcTtTTTTCTCTTTCAA                       | 68 | opsB -26-24 mut<br>to opsE                                                                   |

|                     |                                                                                 |    |                                  |
|---------------------|---------------------------------------------------------------------------------|----|----------------------------------|
| JS664_NT_opsB-18-16 | TTTGAAAGAGAAAAGATGTCTC <u>cacCAAACCGCGAAGCGCACCCGAA</u><br>ATAAAGGAAAATTTCCCAAG | 68 | opsB -18-16 mut to opsE          |
| JS665_T_opsB-18-16  | CTTGGGGAAATTTTCCTTTATTTTCGGGTGCGCTTCGCGGTTTGgtgGAG<br>ACATCTTTTCTCTTTCAA        | 68 | opsB -18-16 mut to opsE          |
| JS467_NT-opsE-mut1  | GAGAAAAAGAGTCTCACCCA <u>ACTGCGAAGCgc</u> ACCCGGACTTAAGT<br>AAATCACTCAGGAA       | 60 | opsE_mut1(opsA/B-mimic-1(AT□GC)) |
| JS468_T-opsE-mut1   | TTCCTGAGTGATTTACTTAAGTCCGGGTgcGCTTCGCAGTTGGGTGAG<br>ACTCTTTTCTC                 | 60 | opsE_mut1(opsA/B-mimic-1(AT□GC)) |
| JS469_NT-opsE-mut2  | GAGAAAAAGAGTCTCACCCAAC <u>cGCGAAGCATA</u> ACCCGGACTTAAGT<br>AAATCACTCAGGAA      | 60 | opsE_mut2(opsA/B-mimic-2(T□C))   |
| JS470_T-opsE-mut2   | TTCCTGAGTGATTTACTTAAGTCCGGGTATGCTTCGCgGTTGGGTGA<br>GACTCTTTTCTC                 | 60 | opsE_mut2(opsA/B-mimic-2(T□C))   |
| JS471_NT-opsE-mut3  | GAGAAAAAGAGTCTCACCCA <u>ACTGCGtAGCATA</u> ACCCGGACTTAAGTA<br>AATCACTCAGGAA      | 60 | opsE_mut3(opsA-mimic-3(A□T))     |
| JS472_T-opsE-mut3   | TTCCTGAGTGATTTACTTAAGTCCGGGTATGCTaCGCAGTTGGGTGA<br>GACTCTTTTCTC                 | 60 | opsE_mut3(opsA-mimic-3(A□T))     |
| 9563                | GGTCAGTACGTCCGGCATAGTTGCGCCCGTAAATTCAGATCTTCCAG<br>TGG                          | 50 | consensus pause                  |
| 8334                | CCACTGGAAGATCTGAATTTACGGGCGCAACTATGCCGGACGTACT<br>GACC                          | 50 | consensus pause                  |

|       |                                                                                                           |    |                        |
|-------|-----------------------------------------------------------------------------------------------------------|----|------------------------|
| 8342  | <u>UUUUUUGGCAUAGUU</u>                                                                                    | 15 | consensus pause        |
| JS563 | GGTCAGTACGTCCTTTTGGTGGTCGTTGTAGTGGGCAGATCTTCCAGT<br>GG                                                    | 50 | anticonsensus<br>pause |
| 8954  | CCACTGGAAGATCTGCCCCACTACAACGACCACCAAAAGGACGTACT<br>GACC                                                   | 50 | anticonsensus<br>pause |
| 8952  | UUUUUUUUUUGGUGG                                                                                           | 15 | anticonsensus<br>pause |
| 14047 | /5Phos/NNNNNNNNNGCAGCTCTGTAGGCACCATCAATGATCGTCGGA/3ddC/                                                   | 43 | NET-seq                |
| 14637 | /5Phos/AGATCGGAAGAGCACACGTCTGAAC/iSp18/CACTCA/iSp18/CCTACACGAC<br>GCTCTCCGATCTTCCGACGATCATTGATGGTGCCTACAG | 81 | NET-seq                |
| 14641 | AATGATACGGCGACCACCGAGATCTACACAGCGAGCTACACTCTTTCCCTACACG<br>ACGCTCTTCCGATCTTCCGACGATC                      | 80 | NET-seq                |
| 14645 | CAAGCAGAAGACGGCATAAGGATGAGTGACTGGAGTTCAGACGTGTG<br>CTCTTCCGATCT                                           | 66 | NET-seq                |

**Table S2 – *B. fragilis* Strain Construction**

| Purpose                                                                                                                                                      | Plasmid name | Primers             | Sequence                                  |
|--------------------------------------------------------------------------------------------------------------------------------------------------------------|--------------|---------------------|-------------------------------------------|
| ['-10:-1]opsA in PSE' = Clone opsA region into PSE region into pLGB13 - left flank amplified from Δmpi M44                                                   | pKF32        | opsA-PSE-LF_F       | taagattagcattatgagtgccggctgtggaggcaattatc |
|                                                                                                                                                              |              | opsA-PSE-LF_R       | acgcggttggtgagactca                       |
|                                                                                                                                                              |              | opsA-PSE-RF_F       | agagtctcacccaaccgcgtagegcacccggacttaag    |
|                                                                                                                                                              |              | opsA-PSE-RF_R       | cgaattcctgcagcccggggcagtctcctgctcatctatcg |
| Replacing opsE (+PSE hairpin) with opsA (+PSA hairpin) in pLGB13                                                                                             | pKF52        | HPops-LF_F          | taagattagcattatgagtgcctgggaacaaaacaaag    |
|                                                                                                                                                              |              | HPops-LF_R          | attcaaaccgactgcaagatttttatgac             |
|                                                                                                                                                              |              | HPopsA_F            | atcttgcactcggttgaatgggaaaagatg            |
|                                                                                                                                                              |              | HPopsA_R            | taagtccgggtgcgctacgcggtttgga              |
|                                                                                                                                                              |              | HPops-RF_F          | gcgtagegcacccggacttaagtaaatcac            |
|                                                                                                                                                              |              | HPops-RF_R          | cgaattcctgcagcccggggcagtctcctgctcatctatc  |
| Clone rpoC-3X-FLAG in pLGB13 - left flank amplified from Jason's construct pJS039_Bf-rpoC-3X-FLAG, right flank amplified from <i>B. fragilis</i> 9343 genome | pKF36        | rpoC-3X_FLAG-LF_fwd | taagattagcattatgagtgcctgtaggtggacacgtag   |

|  |  |                     |                                         |
|--|--|---------------------|-----------------------------------------|
|  |  | rpoC-3X_FLAG-LF_rev | ttgaattgtatcatttgcgtcatcgtc             |
|  |  | rpoC_3X_FLAG-RF_fwd | cgacaaatgatacaattcaattgactatagctgaaaaag |
|  |  | rpoC_3X_FLAG-RF_rev | cgaattcctgcagcccggggcgcaattcaaccaagacgc |

**Table S3 – Plasmids**

| <b>Plasmid</b> | <b>Lab Stock#</b> | <b>Purpose</b> | <b>Properties</b>                                                     | <b>Construction</b>                                       | <b>Parent (s)</b> | <b>Anti-biotic</b> |
|----------------|-------------------|----------------|-----------------------------------------------------------------------|-----------------------------------------------------------|-------------------|--------------------|
| pJS011         | 5903              | T7 OEP         | Bf UpaY-intein-CBD                                                    | pTYB2 (Stock 182) backbone, UpaY from Bfragilis NCTC 9343 | pTYB2 (Stock 182) | Amp                |
| pJS015         | 5906              | T7 OEP         | BfRNAP, strep-rpoB, rpoC-his10ppx                                     | pRM756 backbone, codon-optimized BfRNAP                   | pRM756            | Kan                |
| pJS019         | 5910              | T7 OEP         | Bf UpeY-inteinCBD (CTD Ala insertion for optimal cleavage)            | pTYB2 (Stock 182) backbone, UpeY from Bfragilis NCTC 9343 | pTYB2 (Stock 182) | Amp                |
| pJS021         | 5912              | T7 OEP         | Bf UpaZ-inteinCBD (CTD Ala insertion for optimal cleavage)            | pTYB2 (Stock 182) backbone, UpaZ from Bfragilis NCTC 9343 | pTYB2 (Stock 182) | Amp                |
| pJS022         | 5913              | T7 OEP         | Bf UpfY-inteinCBD (CTD Ala insertion for optimal cleavage efficiency) | pTYB2 (Stock 182) backbone, UpfY from Bfragilis NCTC 9343 | pTYB2 (Stock 182) | Amp                |
| pJS028         | 5917              | T7 OEP         | Bf UphY-inteinCBD (CTD Ala insertion for optimal cleavage efficiency) | pTYB2 (Stock 182) backbone, UphY from Bfragilis NCTC 9343 | pTYB2 (Stock 182) | Amp                |
| pJS031         | 5920              | T7 OEP         | BfGre-inteinCBD (CTD Ala insertion for optimal cleavage efficiency)   | pTYB2 (Stock 182) backbone, Gre from Bfragilis NCTC 9343  | pTYB2 (Stock 182) | Amp                |

|        |      |        |                                                                                   |                                                                                      |                   |     |
|--------|------|--------|-----------------------------------------------------------------------------------|--------------------------------------------------------------------------------------|-------------------|-----|
| pJS034 | 5922 | T7 OEP | Bf UpbY-inteinCBD (CTD Ala insertion for optimal cleavage efficiency)             | pTYB2 (Stock 182) backbone, UpbY from Bfragilis NCTC 9343                            | pTYB2 (Stock 182) | Amp |
| pJS036 | 5924 | T7 OEP | Bf UpeZ-inteinCBD (CTD Ala insertion for optimal cleavage efficiency)             | pTYB2 (Stock 182) backbone, UpeZ from Bfragilis NCTC 9343                            | pTYB2 (Stock 182) | Amp |
| pJS044 | 5932 | T7 OEP | NusG-inteinCBD (CTD Ala insertion for optimal cleavage efficiency)                | pTYB2 (Stock 182) backbone, NusG from Bfragilis NCTC 9343                            | pTYB2 (Stock 182) | Amp |
| pJS045 | 5934 | T7 OEP | NusA-inteinCBD (CTD Ala insertion for optimal cleavage efficiency)                | pTYB2 (Stock 182) backbone, NusA from Bfragilis NCTC 9343                            | pTYB2 (Stock 182) | Amp |
| pJS058 | 5943 | T7 OEP | Bf UpeY(NTD)-inteinCBD (CTD Ala insertion for optimal cleavage efficiency)        | pTYB2 (Stock 182) backbone, fragments from Bfragilis NCTC 9343                       | pTYB2 (Stock 182) | Amp |
| pJS059 | 5944 | T7 OEP | Bf UpfY(NTD)-inteinCBD (CTD Ala insertion for optimal cleavage efficiency)        | pTYB2 (Stock 182) backbone, fragments from Bfragilis NCTC 9343                       | pTYB2 (Stock 182) | Amp |
| pJS060 | 5945 | T7 OEP | Avi-UpeY-inteinCBD (CTD Ala insertion for optimal cleavage efficiency)            | pTYB2 (Stock 182) backbone, 2 oligos for Avi tag, fragments from Bfragilis NCTC 9343 | pTYB2 (Stock 182) | Amp |
| pJS063 | 5948 | T7 OEP | Bf eY(NGN)-bY(KOW)-intein-CBD (CTD Ala insertion for optimal cleavage efficiency) | pTYB2 (Stock 182) backbone, eY NGN and bY KOW from Bfragilis NCTC 9343               | pTYB2 (Stock 182) | Amp |

|        |      |                                               |                                                                                  |                                                                        |                   |     |
|--------|------|-----------------------------------------------|----------------------------------------------------------------------------------|------------------------------------------------------------------------|-------------------|-----|
| pJS064 | 5949 | T7 OEP                                        | Bf bY(NGN)-eY(KOW)-inteinCBD (CTD Ala insertion for optimal cleavage efficiency) | pTYB2 (Stock 182) backbone, bY NGN and eY KOW from Bfragilis NCTC 9343 | pTYB2 (Stock 182) | Amp |
| pJS073 | 5958 | T7 OEP                                        | Bf UpcY-intein CBD (CTD Ala insertion for optimal cleavage efficiency)           | pTYB2 (Stock 182) backbone, UpcY from Bfragilis NCTC 9343              | pTYB2 (Stock 182) | Amp |
| pKF32  | 5963 | Test ops replacement effects on PS expression | [-10:-1]opsA in PSE = "opsE>opsE/A" in figure                                    | See methods and Table S2                                               |                   |     |
| pKF36  | 5966 | epitope tag RNAP                              | rpoC-3xFLAG                                                                      | See methods and Table S2                                               |                   |     |
| pKF52  |      | Test ops replacement effects on PS expression | [-43:-1]opsA in PSE = "opsE>opsA" in figure                                      | See methods and Table S2                                               |                   |     |



**Table S4 – Strains used in this study**

| Strain                                                                            | Notes                                                                                                                                                                                                                                                                                                                                                                                                                                                                                                                        | Source           |
|-----------------------------------------------------------------------------------|------------------------------------------------------------------------------------------------------------------------------------------------------------------------------------------------------------------------------------------------------------------------------------------------------------------------------------------------------------------------------------------------------------------------------------------------------------------------------------------------------------------------------|------------------|
| <i>B. fragilis</i> NCTC 9343                                                      | wild type strain from which all mutants were derived                                                                                                                                                                                                                                                                                                                                                                                                                                                                         | ATCC             |
| <i>B. fragilis</i> 9343 $\Omega$ PSE                                              | insertional mutant in PSE locus abrogating PSE synthesis                                                                                                                                                                                                                                                                                                                                                                                                                                                                     | Ref <sup>1</sup> |
| <i>B. fragilis</i> 9343 $\Delta$ <i>mpi</i> M44                                   | Promoter PSA and PSE locked on. (PSC constitutive)                                                                                                                                                                                                                                                                                                                                                                                                                                                                           | Ref <sup>2</sup> |
| <i>B. fragilis</i> 9343 $\Delta$ <i>mpi</i> M44 $\Delta$ <i>upaZ</i>              | Promoter PSA and PSE locked on. (PSC constitutive). <i>upaZ</i> deletion                                                                                                                                                                                                                                                                                                                                                                                                                                                     | Ref <sup>3</sup> |
| <i>B. fragilis</i> 9343 <i>mpi</i> M44 [-10:-1] <i>opsE</i> >[-10:-1] <i>opsA</i> | replacing <i>opsE</i> [-10:-1] with <i>opsA</i> [-10:-1]                                                                                                                                                                                                                                                                                                                                                                                                                                                                     | This study       |
| <i>B. fragilis</i> 9343 <i>mpi</i> M44 HP- <i>opsE</i> >HP- <i>opsA</i>           | replacing <i>opsE</i> [-38:-1] with <i>opsA</i> [-38:-1]                                                                                                                                                                                                                                                                                                                                                                                                                                                                     | This study       |
| RL3569                                                                            | <i>E. coli</i> B F <sup>-</sup> <i>ompT</i> gal [dcm <sup>-</sup> ] [lon <sup>-</sup> ] <i>hsdS</i> <sup>-</sup> (rB <sup>-</sup> mB <sup>-</sup> ) [ $\lambda$ DE3(lacUV5::T7 RNAP) <i>imm21</i> int <sup>-</sup> - $\Delta$ <i>nin5</i> $\Delta$ EcoRI(21226-26104) BamHI27972 <sup>-</sup> ] pRARE2<br><br>Rif-resistant expression strain (S522F) for expressing recombinant RNA polymerases. Made by transduction of RL1674 with P1 lysate of Gourse Lab strain (RLG3360). RLG3360 is stored in our database as RL3570. | This study       |
| <i>B. fragilis</i> 9343 <i>rpoC</i> -FLAG                                         | 3x FLAG tag on C-terminus of b' subunit to enable immunoprecipitation                                                                                                                                                                                                                                                                                                                                                                                                                                                        | This study       |

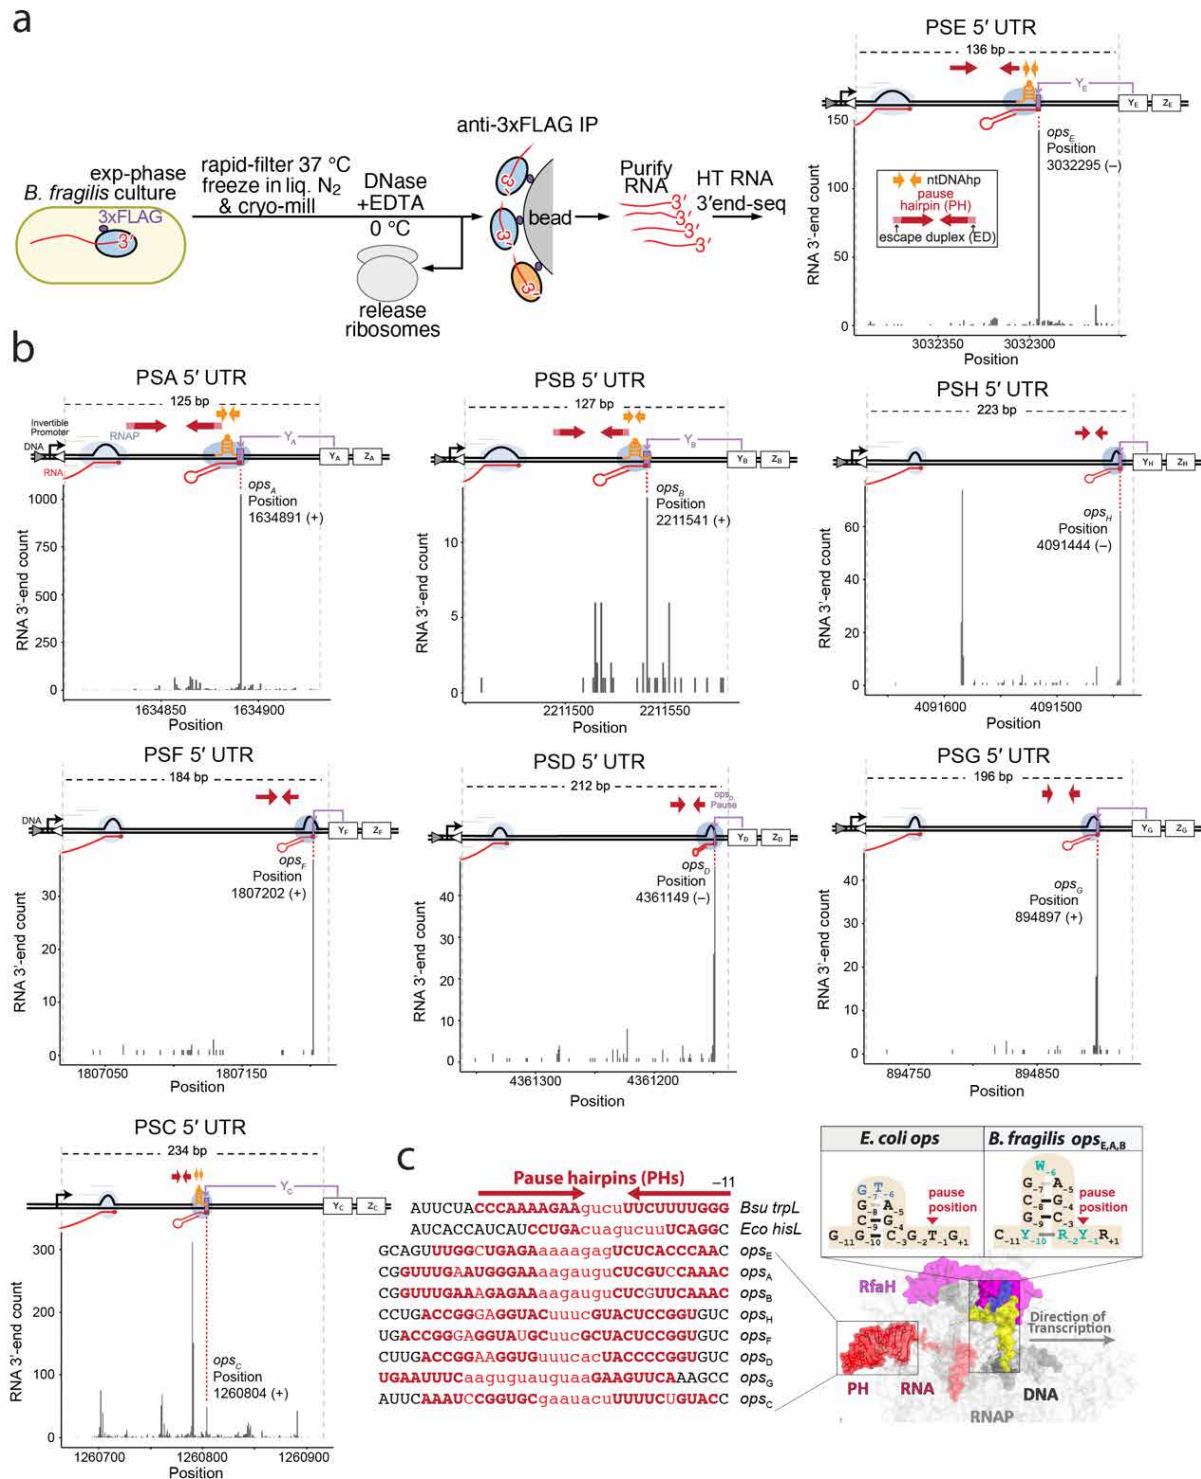

**Supplementary Fig. 1. *ops<sub>X</sub>* pauses found by NET-seq. a)** Schematic depiction of NET-seq. **b)** CPS operon leaders aligned with mapped NET-seq reads (Genbank accession NC\_003228.3). Genome coordinates are PSA 1634806:1634931(+); PSB 2211455:2211581 (+); PSC 1260676:1260910 (+); PSD 4361353:4361141(-); PSE 3032389:3032254(-); PSF 1807026:1807210(+); PSG 894725:894921(+); PSH 4091659:4091436(-). Red arrows indicate PH stems. Orange arrows indicate ntDNAhp stems. **(c)** Comparison of ntDNAhps in some CPS leader *ops<sub>X</sub>* sites to the RfaH *ops* ntDNAhp<sup>4</sup> and comparison of *ops<sub>X</sub>* RNA hairpins to known examples. Base lettering follows IUPAC nomenclature. Blue colored nucleotides in *ops<sub>X</sub>* make base-specific contacts to RfaH<sup>4-6</sup>. The model was generated in PyMol (see Methods and Reporting Summary).

## a Promoter-less in vitro transcription (PIVoT)

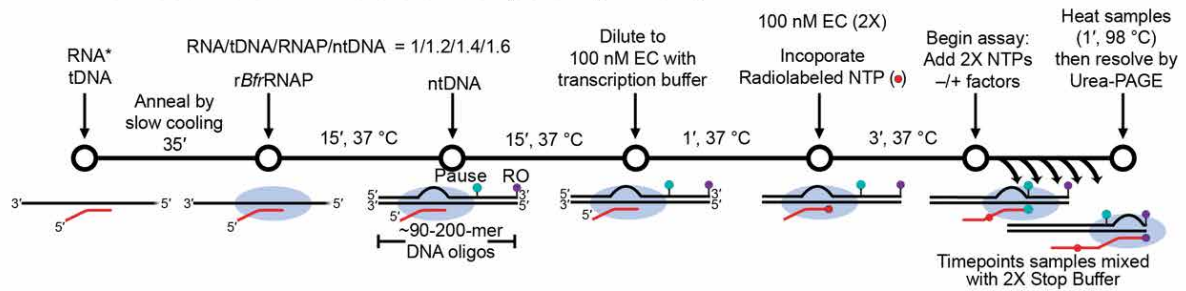

## b recombinant *Bfr*RNAP

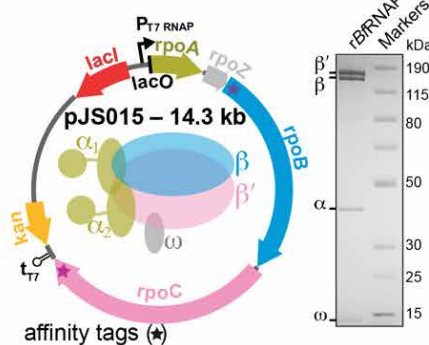

## c *Bfr*RNAP recognizes *Eco* consensus pause

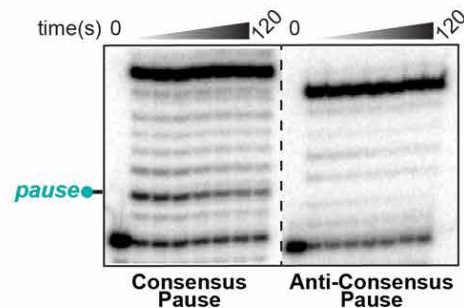

## d PIVoT assays of *ops<sub>x</sub>* pauses

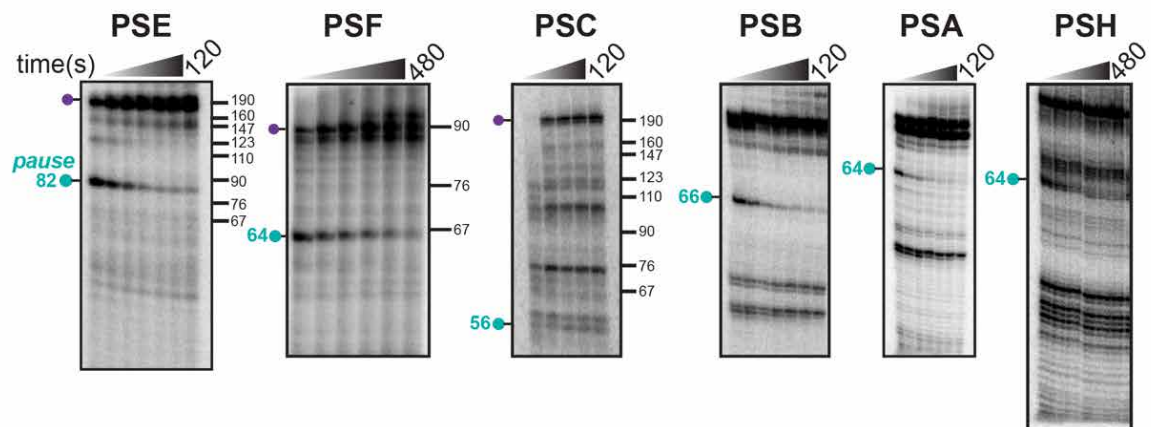

**Supplementary Fig. 2. *ops<sub>x</sub>* pause mapping by PIVoT. a)** Schematic of PIVoT assays. \*, source radiolabel (either 5'-<sup>32</sup>P-labeled RNA or incorporation of [ $\alpha$ -<sup>32</sup>P]NMP at RNA 3' end, depending on the assay; see Methods). **b)** *rBfr*RNAP overexpression plasmid and final purified RNAP separated by SDS-PAGE and Coomassie-stained. Stars indicate terminal affinity tags. **c)** *rBfr*RNAP pauses on consensus but not anti-consensus pause sequences. **d)** Representative transcriptional pauses from distinct CPS operon leader regions mapped in vitro. PIVoT assay of relevant regions from CPS operon leader regions. Some pauses (e.g., PSH, are more prominent in the presence of NusA or cognate Y<sub>X</sub> (see Supplementary Fig. 4). Pause quantitation is provided for representative Class 1 and 2 *ops<sub>x</sub>* in Fig. 1d.





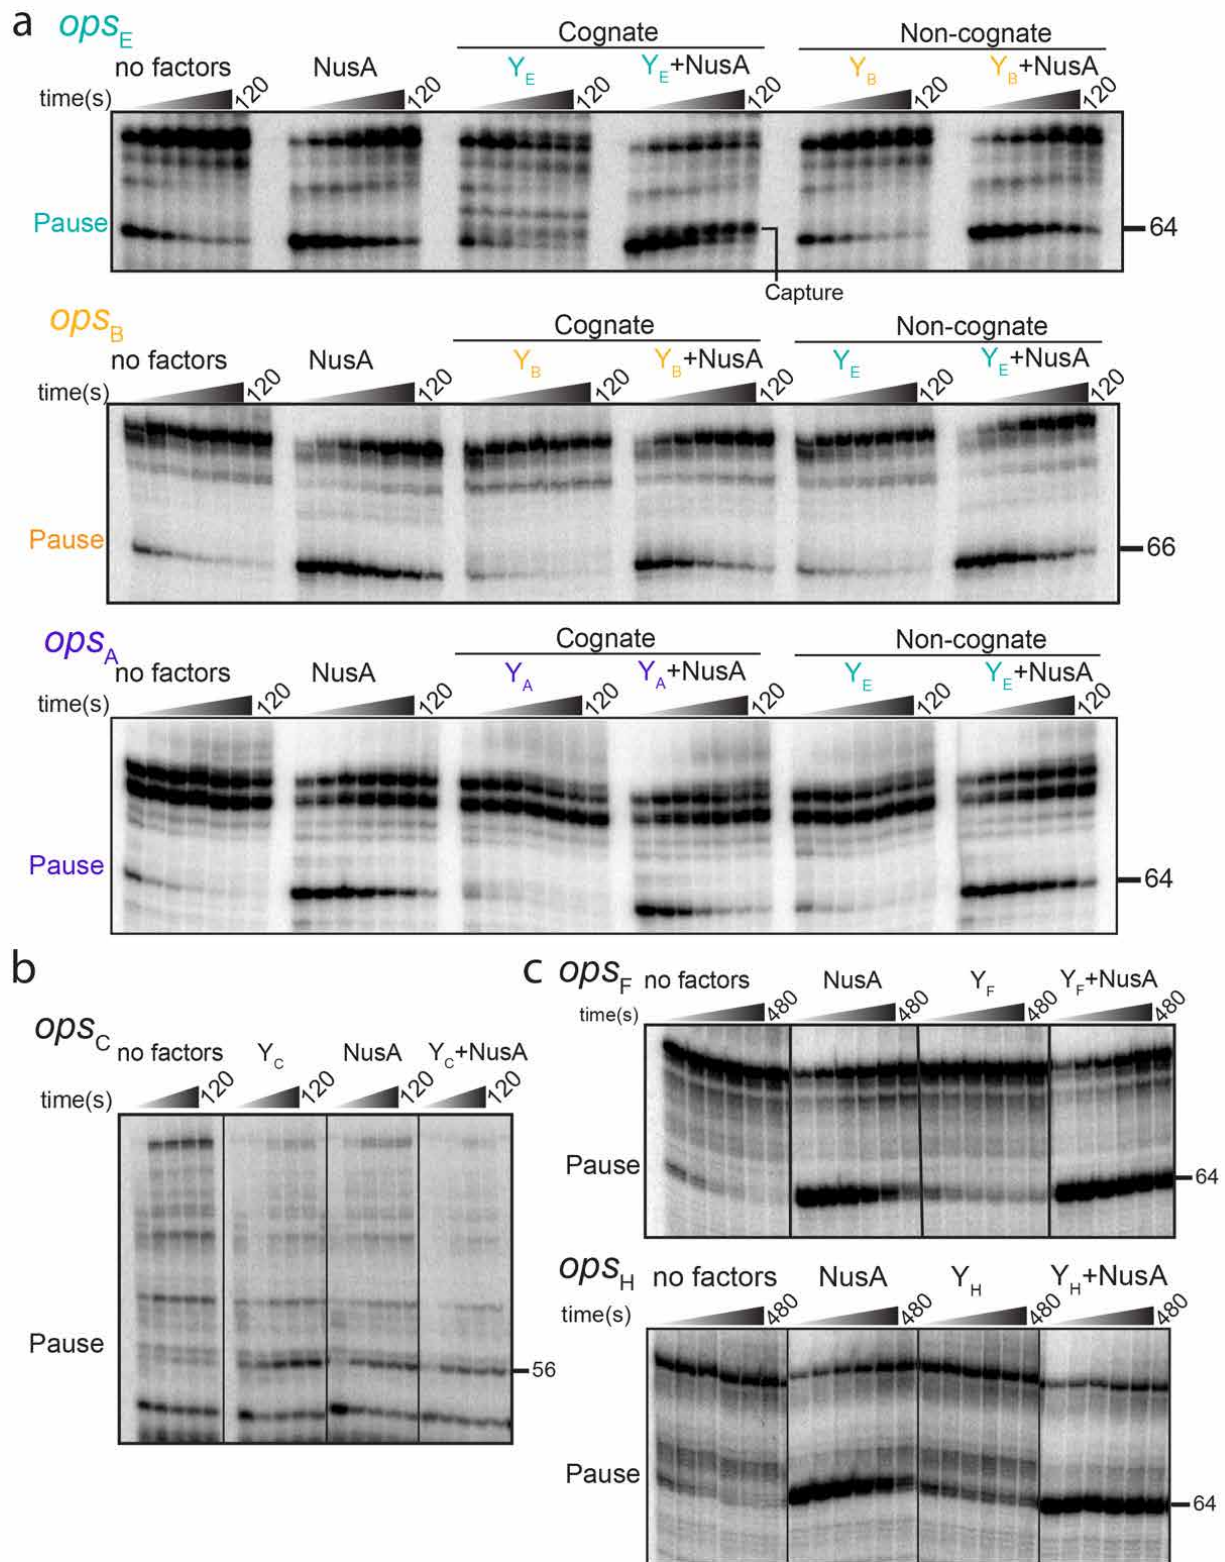

**Supplementary Fig. 4.**  $Y_X$  and NusA effects at 6 different  $ops_X$  sites. Pause strengths and factor effects are quantified for representative Class 1 and 2  $ops_X$  sites in Fig 1d. **a)** PIVoT assays for Class 1  $ops_E$ ,  $ops_A$ , and  $ops_B$  (150 nM  $Y_X$ , 1  $\mu$ M NusA, and 200  $\mu$ M NTPs added concomitantly where indicated). **b)** PIVoT assay for  $ops_C$  (0.5  $\mu$ M  $Y_C$ , 0.5  $\mu$ M NusA, and 200  $\mu$ M NTPs added concomitantly where indicated). **c)** PIVoT assays for Class 2  $ops_H$  and  $ops_F$  (1  $\mu$ M  $Y_X$ , 1  $\mu$ M NusA, and 500  $\mu$ M NTPs added concomitantly where indicated).

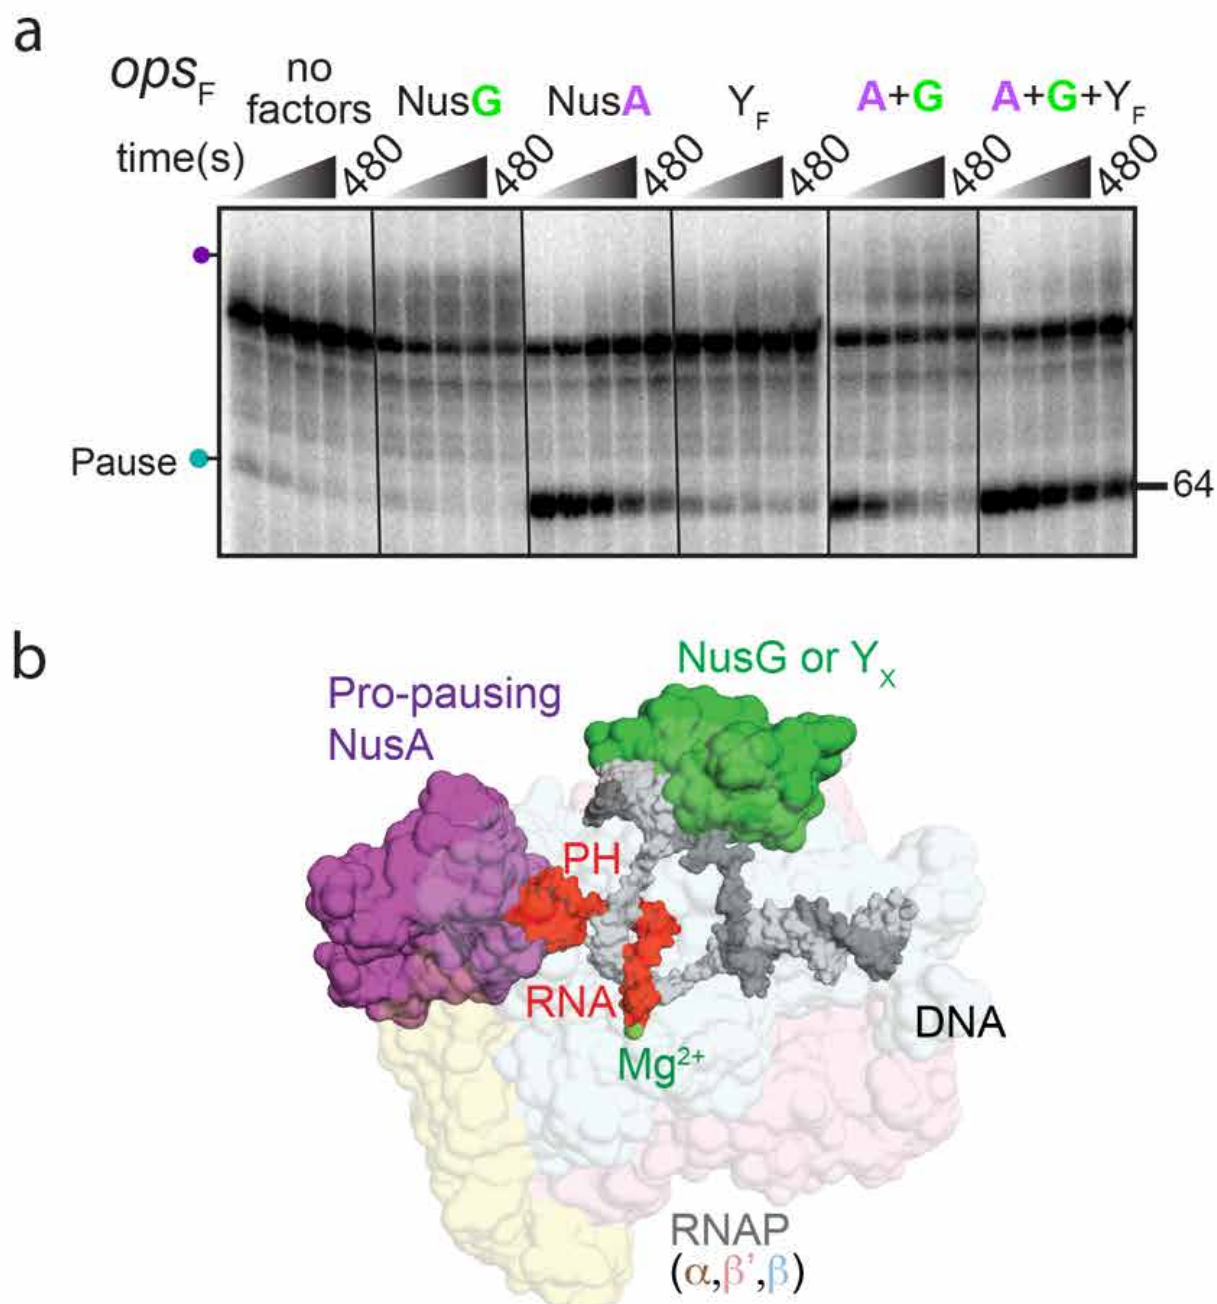

**Supplementary Fig. 5.** Y<sub>F</sub> outcompetes NusG at *ops*<sub>F</sub>. **a)** PIVoT assays performed with 1 μM Y<sub>F</sub>, 1 μM NusG, 0.5 μM NusA, and 0.5 mM NTPs added concomitantly where indicated. **b)** Homology model of a *Bfi*-RNAP PEC bound by NusG NGN, and NusA (see Methods).

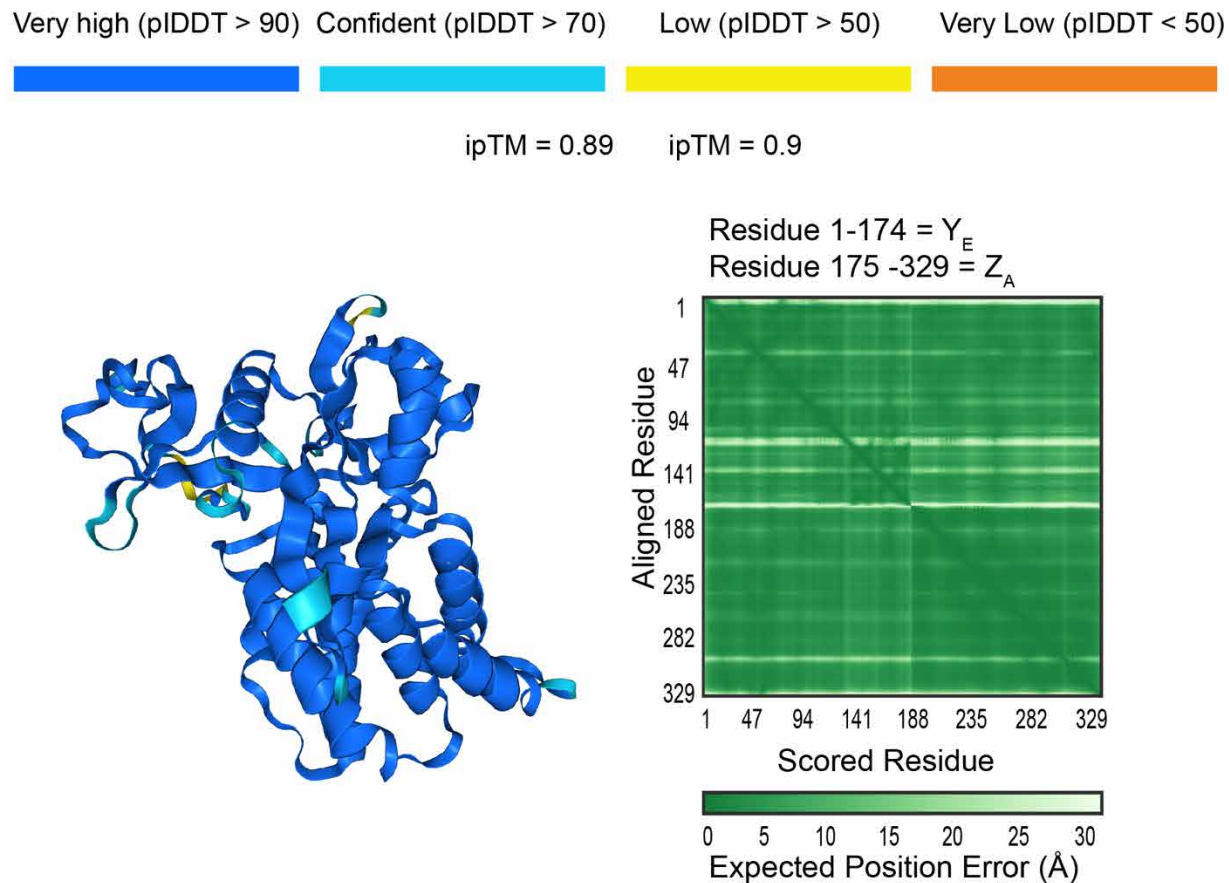

**Supplementary Fig. 6.** Confidence metrics from AlphaFold 3<sup>7</sup>  $Y_E$ - $Z_A$  complex structural prediction. The interface predicted template modeling (ipTM) score of 0.89 and predicted template modeling (pTM) score of 0.9 represent confident high-quality predictions (values greater than 0.8).

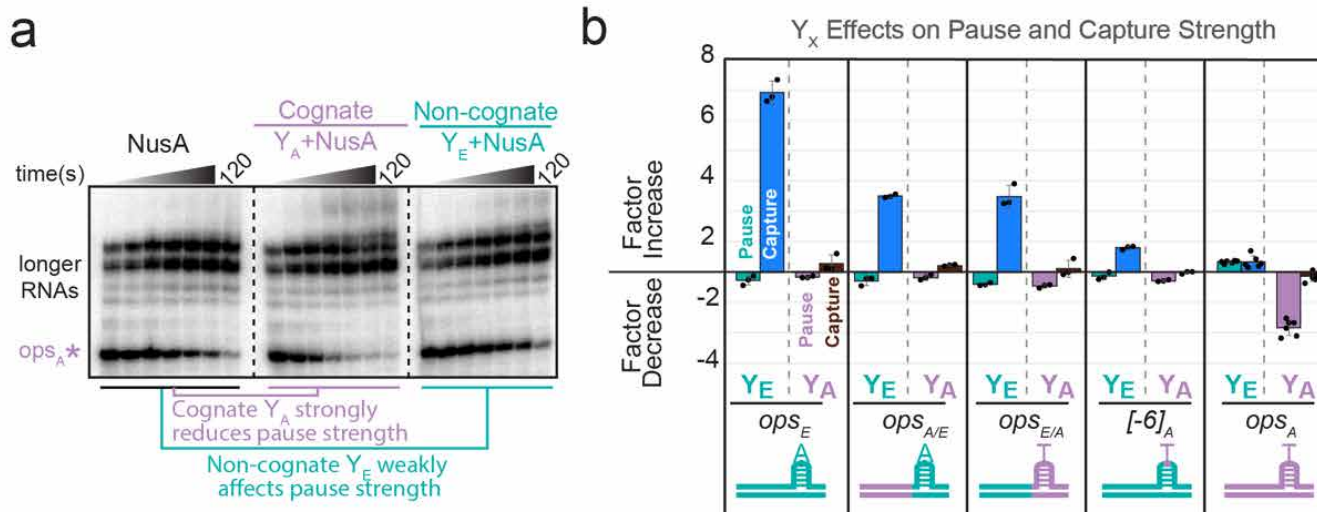

**Supplementary Fig. 7.** Effects of  $Y_E$  and  $Y_A$  on WT  $ops_X$  and hybrid  $ops_X$  sequences in PIVoT assays. **a)** Full time-course PIVoT assay illustrating cognate  $Y_A$ , but not non-cognate  $Y_E$ , modulates the strength of the  $ops_A$  pause. **b)** PIVoT assay quantitation of  $Y_A$  and  $Y_E$  activities on WT or hybrid scaffolds. Assays were performed in at least triplicate at a single timepoint (45 s) in the presence of 1  $\mu$ M NusA and 100  $\mu$ M NTPs, adding 150 nM  $Y_E$  or 150 nM  $Y_A$ . Fold effects are relative to the NusA-only condition.  $Y_E$  association on WT  $ops_E$  manifests primarily as capture activity, whereas  $Y_A$  association at  $ops_A$  manifests as anti-pausing activity (see Supplementary Fig. 4). Error bars represent standard deviations from three experiments.



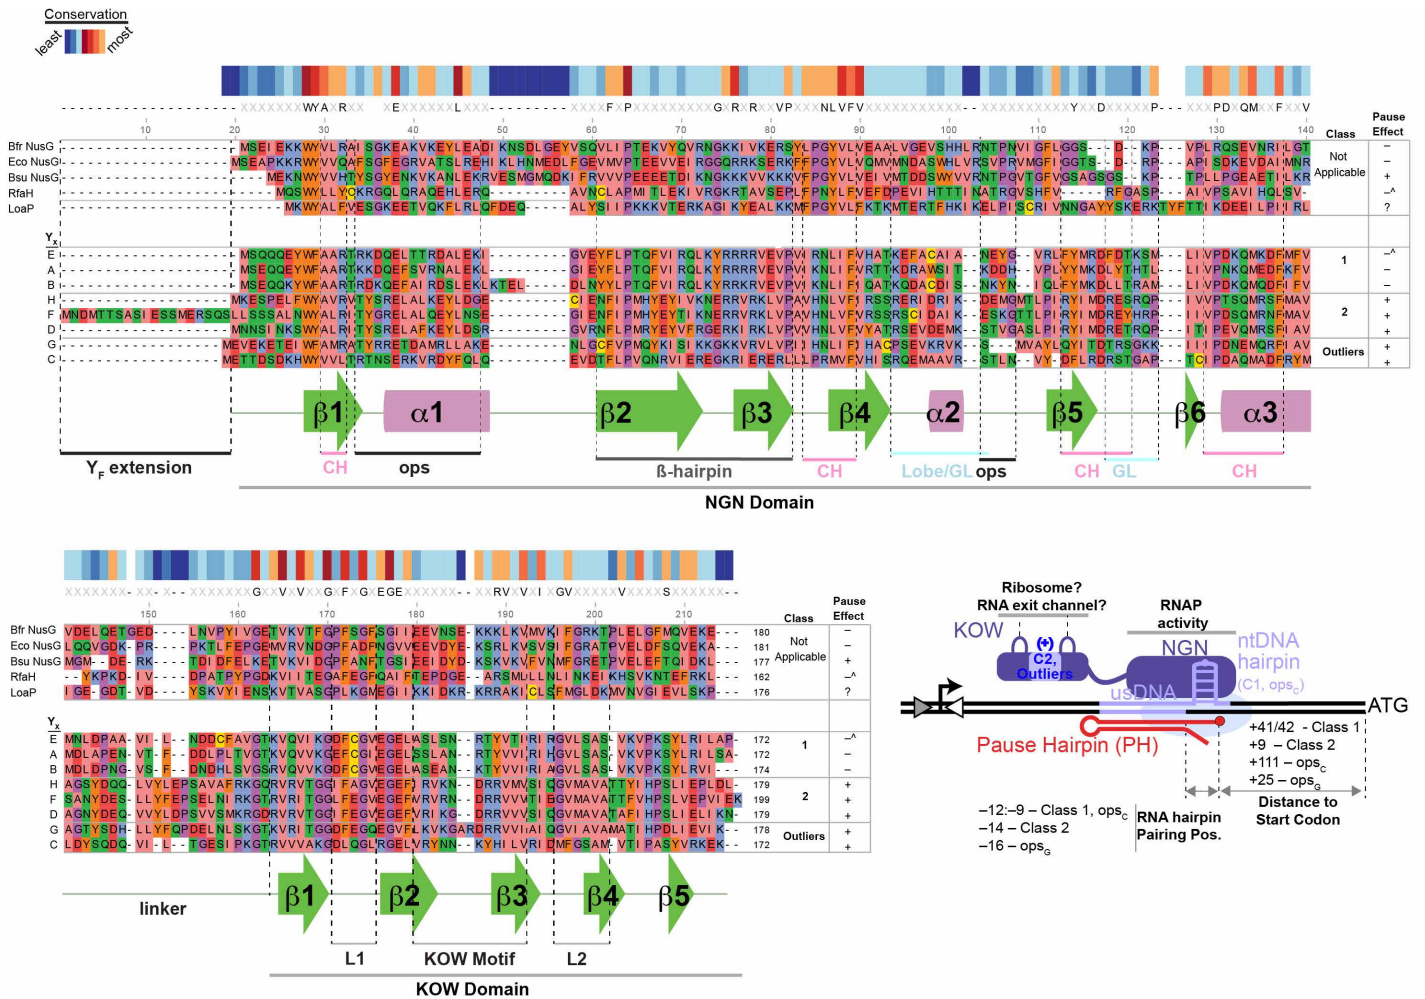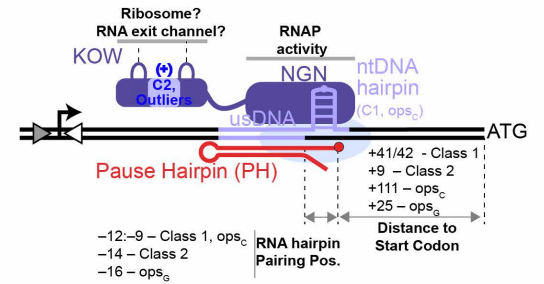

**Supplementary Fig. 8.** Y<sub>X</sub> alignment compared to NusGs and orthologous factors. Sequences were aligned in SnapGene using the ClustalOmega algorithm. Amino acids are highlighted based on physico-chemical properties. ‘Pause effects’ indicate Y<sub>X</sub> effects on pausing (‘^’ superscript indicates that RfaH<sup>6</sup> or Y<sub>E</sub> suppressed pausing at the pause site (*ops* or *ops<sub>E</sub>*), but enhanced pausing a few nucleotides downstream). *Bfr*-NusG pause suppression is shown in Supplementary Fig. 5. *Eco*NusG pause suppression and *Bsu*NusG pause enhancement are documented<sup>8-11</sup>. Features depict some NusG<sub>SP</sub>-interacting modules of a PEC (lobe-gate loop [GL], clamp helices [CH]), *ops* ntDNAhp, and features of NusG<sub>SP</sub> (NGN, KOW, β hairpin). Bottom right: a cartoon summary of some class-specific features. Blue (+) indicates a positively charged KOW motif is found in Class 2 Y<sub>X</sub> and Outlier Y<sub>X</sub>, similar to the positively charged KOW motif of LoaP<sup>12</sup>.

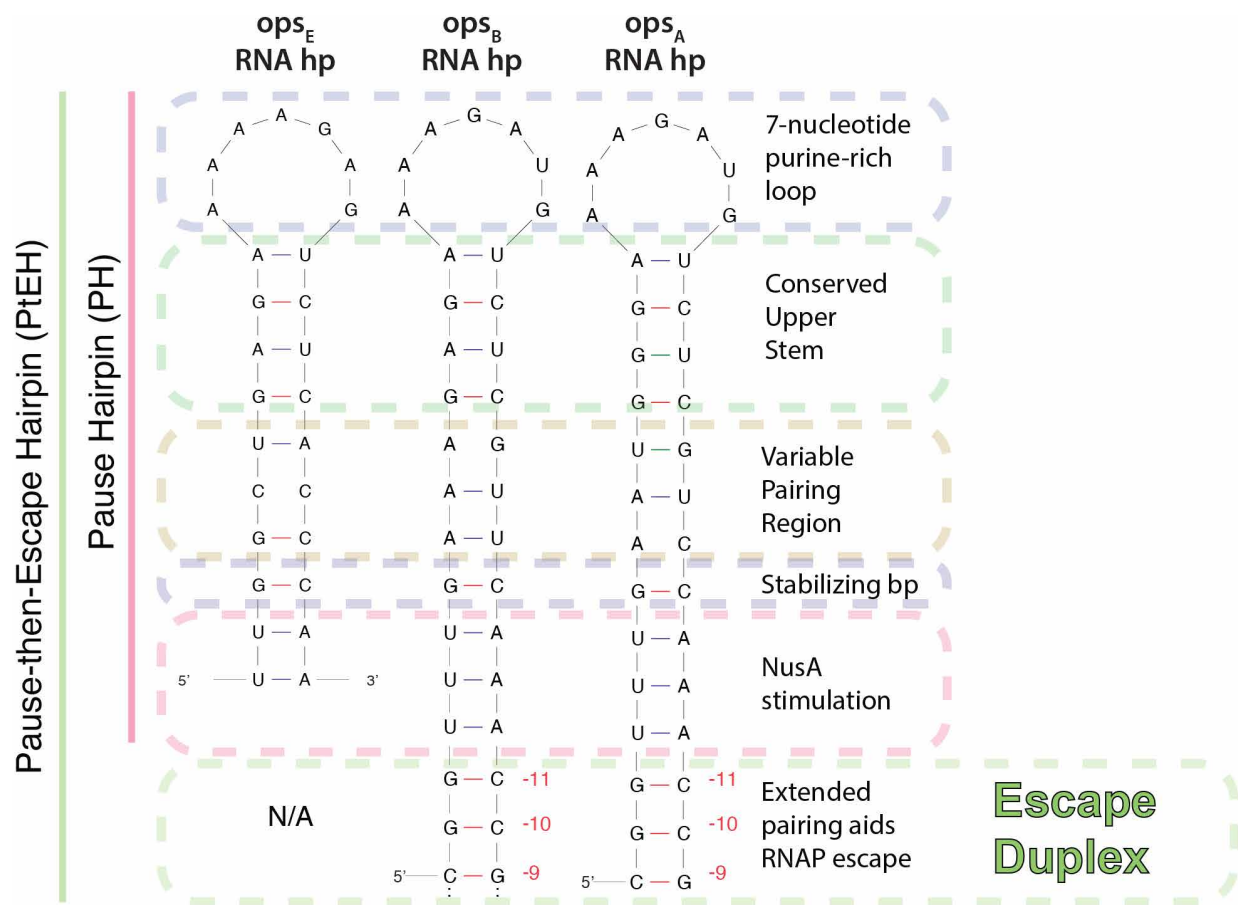

**Supplementary Fig. 9.** Predicted secondary structures of nascent RNA hairpins.

a

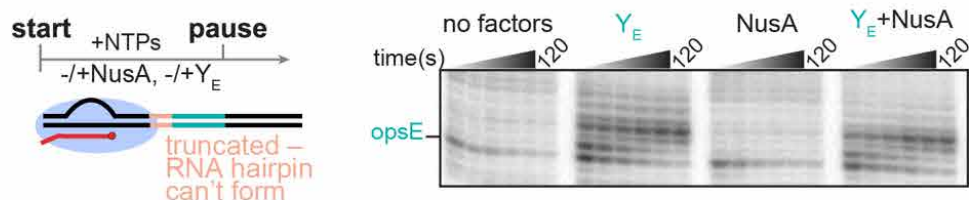

b

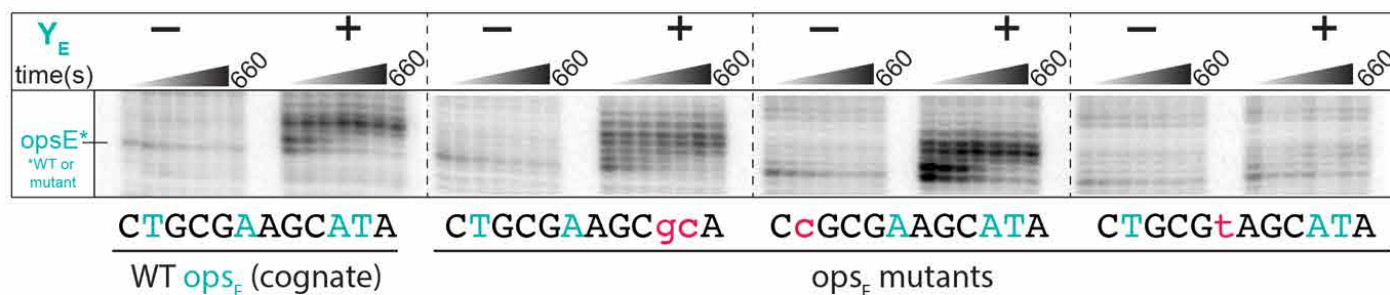

**Supplementary Fig. 10.** Effects of *opsE* mutants on Y<sub>E</sub> or NusA activity. **a)** NusA does not noticeably enhance pausing at *opsE* in the absence of RNA hairpins. Experimental scheme testing the effect of NusA in the absence of upstream sequence enabling RNA hairpin formation. RNAP is reconstituted on a nucleic-acid scaffold with truncated upstream DNA. PIVoT assays performed with 150 nM Y<sub>X</sub>, 1 μM NusA, and 100 μM NTPs added concomitantly where indicated. **b)** Effects of substitutions within the -10:-1 *opsE* window on Y<sub>E</sub> activity. Results shown are representative of triplicate experiments.





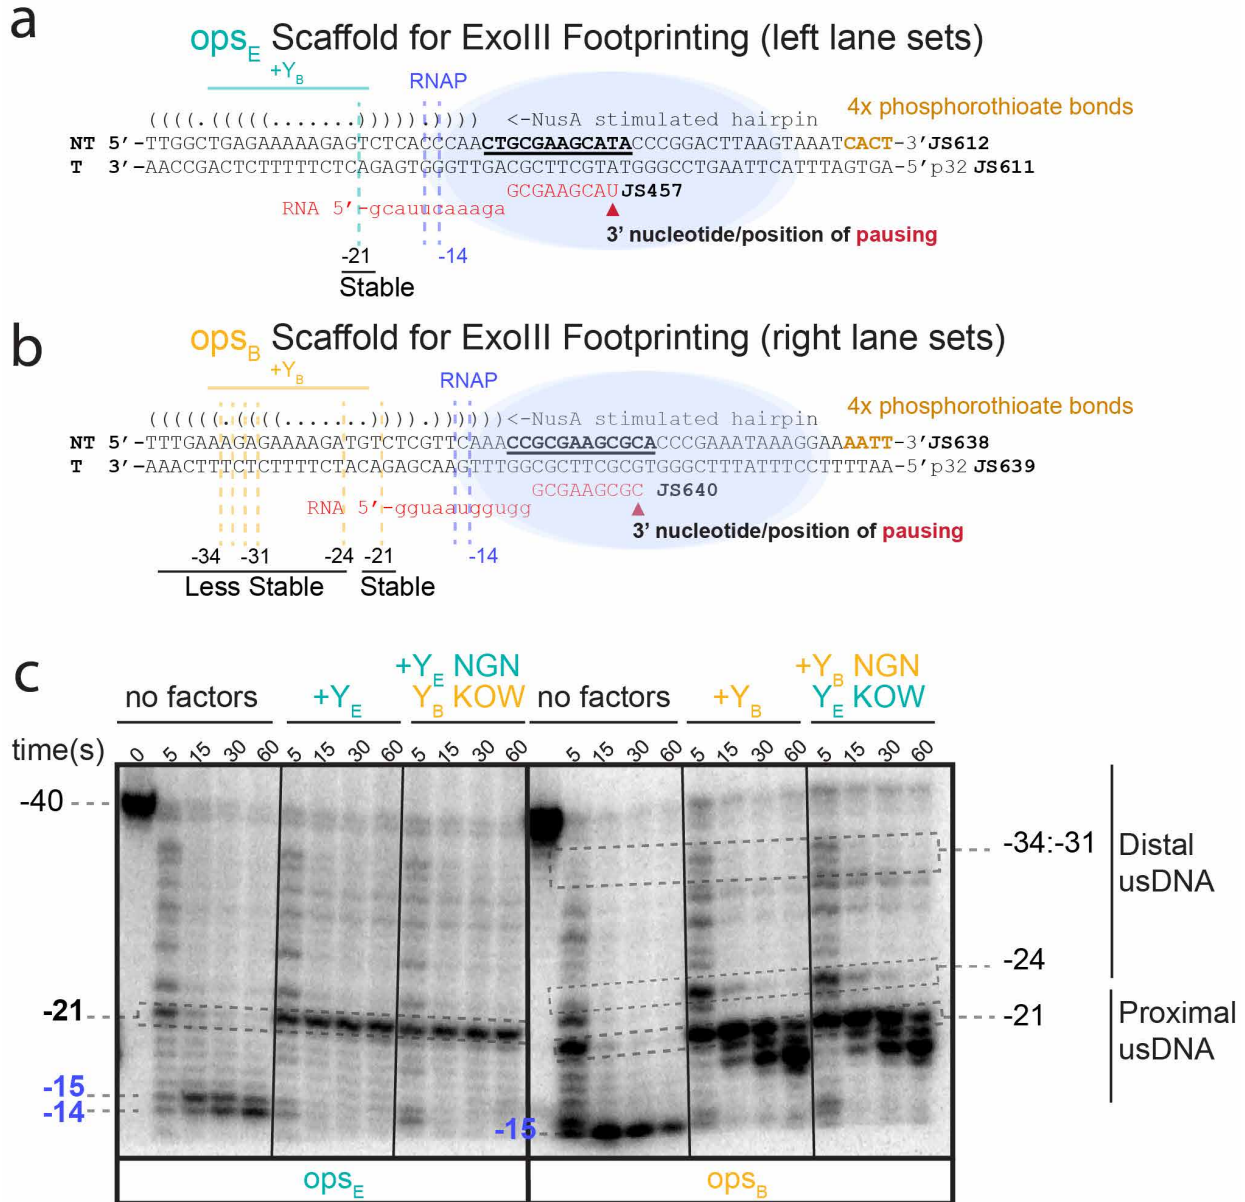

**Supplementary Fig. 12.** Primary data associated with Fig 6b. Representative of experiments performed in at least duplicate (see Methods). **a)** Nucleic acid scaffold used for exonuclease footprinting experiments mapping Y<sub>E</sub> or hybrid Y<sub>E</sub>-Y<sub>B</sub> NGN-KOW footprints on *ops<sub>E</sub>*. Footprints in the absence or presence of Y<sub>B</sub> are indicated by dashed lines. 4x phosphorothioate bonds were incorporated at the 3' end of the NT strand to prevent its cleavage and associated artifacts during the assay. **b)** Nucleic acid scaffold used for exonuclease footprinting experiments mapping Y<sub>B</sub> or hybrid Y<sub>B</sub>-Y<sub>E</sub> NGN-KOW footprints on *ops<sub>B</sub>*. Footprints in the absence or presence of Y<sub>E</sub> are indicated by dashed lines. 4x phosphorothioate bonds were incorporated at the 3' end of the NT strand to prevent its cleavage and associated artifacts during the assay. **c)** Representative exonuclease footprinting gel (n=2) illustrating that Y<sub>B</sub>, but not Y<sub>E</sub>, protects distal upstream DNA. These footprints were identical between WT and hybrid NGN-KOW proteins harboring an identical NGN domain, suggesting *ops<sub>X</sub>* specificity determinants are created by the NGN domain.

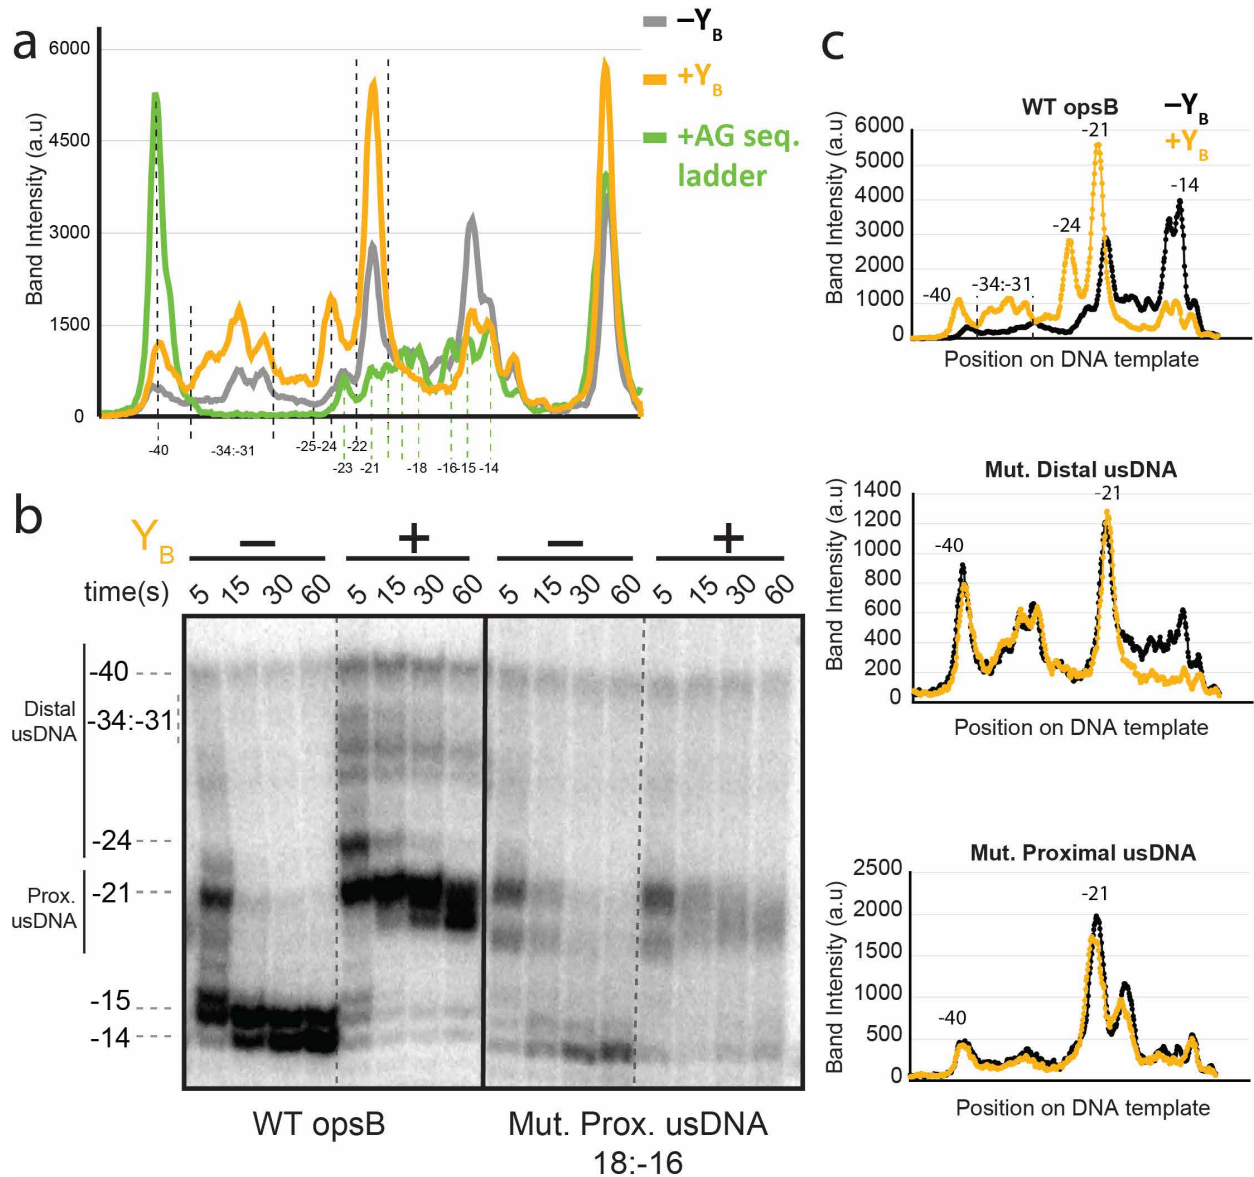

**Supplementary Fig. 13.** Primary data associated with Fig 6c. **a)** Identification of  $Y_B$  protection footprints by comparison to AG sequencing ladder. **b)** Full ExoIII-footprinting time course associated with Fig 6c. Representative of experiment performed in at least duplicate. **c)** Pseudodensitometry plots of the 5-second timepoint lane associated with Fig 6c.

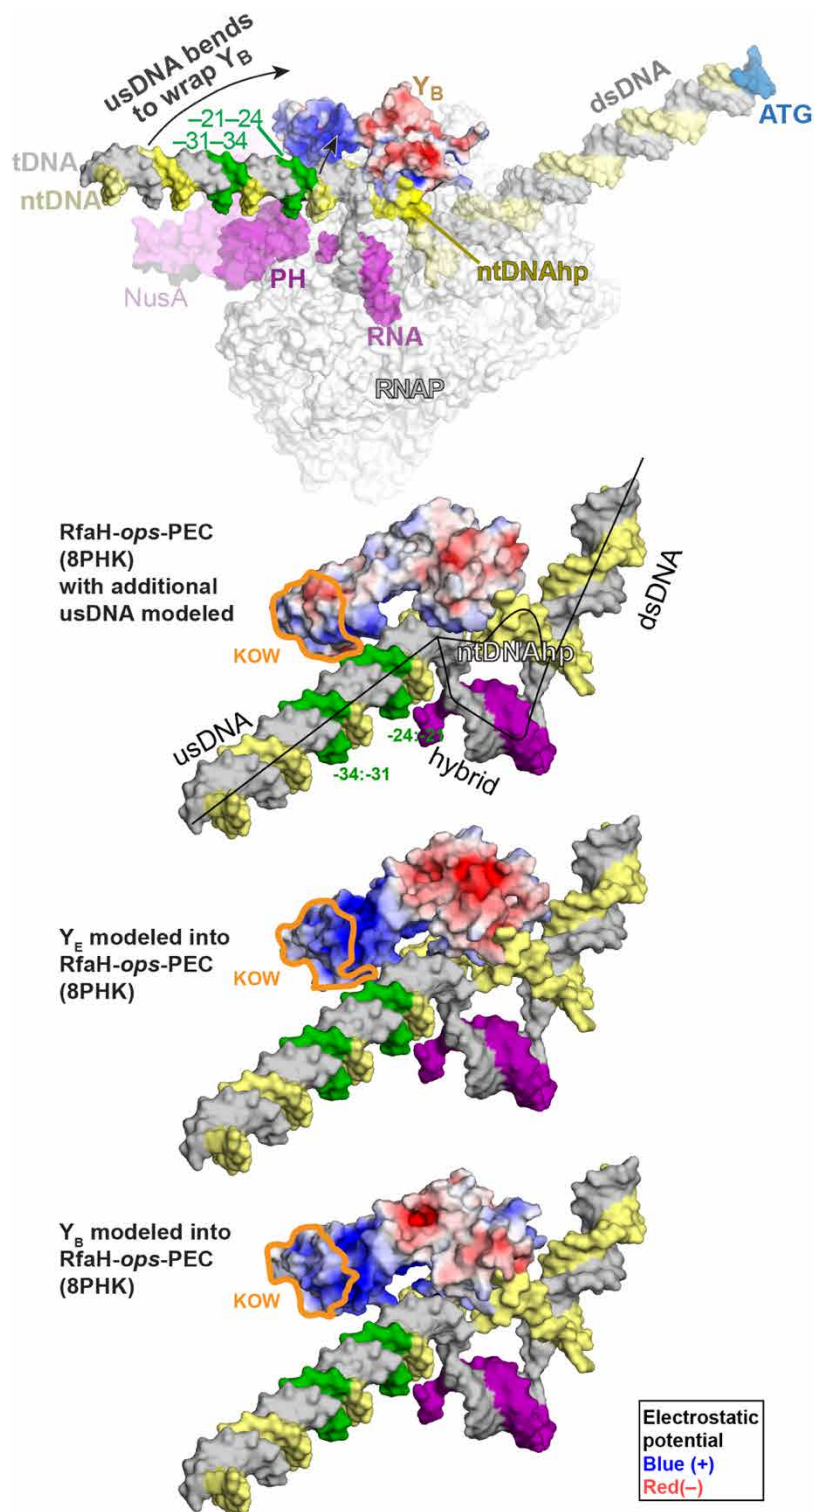

**Supplementary Fig. 14.** Modeling of Class 1 Y<sub>X</sub> suggest that Y<sub>X</sub> provides a larger positively charged surface for usDNA interaction relative to RfaH (*E. coli*). (top) Electrostatic surface potential model of Y<sub>B</sub> recruited to *ops<sub>X</sub>* using the RfaH-ops-PEC (8PHK)<sup>4</sup> as template and modeling additional upstream DNA. Green highlighted regions in the upstream DNA indicate Y<sub>B</sub> footprints. The usDNA must distort to interact with sequence-specifically with Y<sub>B</sub> (black arrows). The RfaH, Y<sub>E</sub>, and Y<sub>B</sub> models below the full PEC model were created using the same structure but with RNAP and NusA are hidden for clarity. RfaH lacks the significant positive charge observed in models of Class 1 Y<sub>E</sub> and Y<sub>B</sub>, suggesting this charge is an evolved feature of Y<sub>X</sub> facilitating readout of upstream DNA. Most of the positive charge is localized to the NGN domain (KOW outlined in orange).

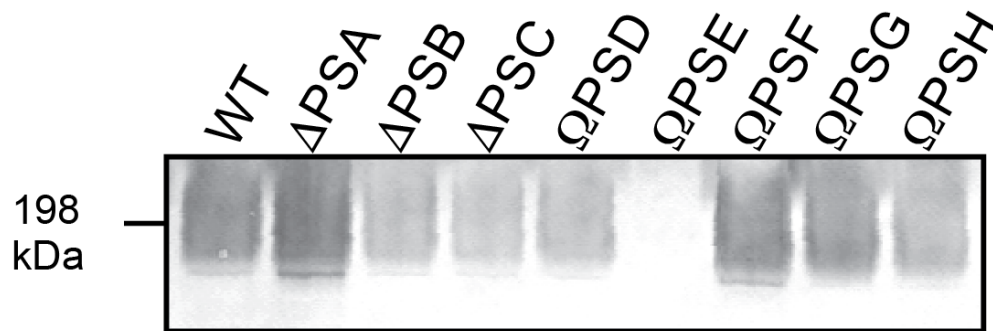

**Supplementary Fig. 15.** The PSE monoclonal antibody (mAb 16) is specific to PSE. This Western immunoblot shows that the mAb 16 reacts with WT and each PSX mutant except for the PSE mutant.





## Scaffolds in Supplementary Fig. 4

opsE+hp (Class 1) (bold DNA is arbitrary (not from UTR) used for reconstitution)

```
(((((.(((.....)))))).)))<-NusA stimulated pause hairpin
NT 5'-GTCCGTTTCGTTTCCACGATCTTGCAGTTTGGCTGAGAAAAAGAGTCTCACCCAACTGCGGAAGCATAACCCGGACTTAAGTAAATCACTCAG-3' JS521
T 3'-CAGGCAAGCAAGGTGCTAGAACGTCAAACCGACTTTTTTCTCAGAGTGGGTGACGCTTCGTATGGGCTGAATTCATTTAGTGAGTC-5' JS522
RNA 5'-UUUUAACGUUCCAC JS146 (bolded RNA nucleotides pair with template DNA oligonucleotide)
```

opsB+hp (Class 1) (bold DNA is arbitrary (not from UTR) used for reconstitution)

```
(((((.(((.(((.....)))))).)))<-Escape Hairpin (shared w/ opsA)
(((((.(((.....)))))).)))<-NusA stimulated hairpin
NT 5'-GTCCGTTTCGTTTCCACGAATTTGACGGTTTGAAAGAGAAAAGATGTCTCGTTCAAAACCGCGAAGCGCAACCCGAAATAAGGAAAATTTCC-3' JS551
T 3'-CAGGCAAGCAAGGTGCTTAAACTGCCAACTTTCTCTTTCTACAGAGCAAGTTTGGCGCTTCGCGTGGGCTTTATTTCTTTTAAAGG-5' JS552
RNA 5'-UUUUAACGUUCCAC JS146 (bolded RNA nucleotides pair with template DNA oligonucleotide)
```

opsA+hp (Class 1) (bold DNA is arbitrary (not from UTR) used for reconstitution)

```
(((((.(((.(((.....)))))).)))<-Escape Hairpin
(((((.(((.....)))))).)))<-NusA stimulated hairpin
NT 5'-GTCCGTTTCGTTTCCACGTCTTACGGTTTGAATGGGAAAAGATGTCTCGTCCAAACCGCGTAGCGCAACCCGAAAGTAACCTCTCGACTTTG-3' JS553
T 3'-CAGGCAAGCAAGGTGCGAGAACTGCCAACTTACCTTTTCTACAGAGCAGGTTTGGCGCATCGCGTGGGCTTTCATTGGAGAGCTGAAAC-5' JS554
RNA 5'-UUUUAACGUUCCAC JS146 (bolded RNA nucleotides pair with template DNA oligonucleotide)
```

opsH+hp (Class 2) (bold DNA is arbitrary (not from UTR) used for reconstitution)

```
(((((.(((.(((.....)))))).)))<-NusA-stimulated hairpin
NT 5'-GTCCGTTTCGTTTCCACGTACCTGACCGGGAGGTACTTTTCGTACTCCGGTGTCCCAAAGAACATCCTTTTGTGAAGGAATCCCCAGAGC-3' JS583
T 3'-CAGGCAAGCAAGGTGCGAGTGGACTGGCCCTCCATGAAAGCATGAGGCCACAGGGGTTTCTTGTAGGAAACACTTCCTTAGGGGTCTCG-5' JS584
RNA 5'-UUUUAACGUUCCAC JS146 (bolded RNA nucleotides pair with template DNA oligonucleotide)
```

opsF+hp (Class 2) (bold DNA is arbitrary (not from UTR) used for reconstitution)

```
(((((.(((.(((.....)))))).)))<-NusA-stimulated hairpin
NT 5'-GTCCGTTTCGTTTCCACGTAACCTGACCGGGAGGTATGCTTCGTACTCCGGTGTCCCAAAGAACATCCTGACGTGAACGACATGACAAC-3' JS523
T 3'-CAGGCAAGCAAGGTGCAATTGAACTGGCCCTCCATACGAAGCGATGAGGCCACAGGGGTTTCTTGTAGGACTGCACTTGCTGTACTGTTG-5' JS524
RNA 5'-UUUUAACGUUCCAC JS146 (bolded RNA nucleotides pair with template DNA oligonucleotide)
```

PSC (bold DNA is arbitrary (not from UTR) used for reconstitution)

```
Bubble Ultramer Scaffold # 1 from PSC 5'UTR (bold region not from UTR)
NT 5'-
GATCGAATCCGTTAACGATCTGTCAAAATCCGGTGCGAATACTTTTTCTGTACCCGATTATCAATAAACTTAATTTGTAAATTTGCTGAAAATAAGGCATGTTTTTGAATATTCCTGTTTTTAAACAAATTTTCATCCTTAGTCATTACTGAAAC
TTTTTCTTACGAACGTAGTCTTGGAGACAACAGATAGCGATAAAC-3' JS708
T 3'-
CTAGCTTAGGCAAGGTGCAAGTTTAGGCCACGCTTATGAAAAGACATGGGCTAATAGTATTTTGAATTAACATTTAACGACTTTTATCCGTACAAAAAACTTATAAGGACAAAAATTTGTTAAAGTAGGAATCAGTAATGACTTTG
AAAAAGAAATGCTTGCATCAGAACTCTGTTGTCTATCGCTATTTG-5' JS709
RNA 5'- UUUUAACGUUCCAC-3' JS146 (bolded RNA nucleotides pair with template DNA oligonucleotide)
```

### Scaffolds in Fig 1d, Supplementary Fig. 5

opsF+hp (Class 2) (bold DNA is arbitrary (not from UTR) used for reconstitution)

```
(((.....(((.....)))))) <-NusA-stimulated hairpin
NT 5'-GTCCGTTTCGTTTCCACGTAACCTGACCGGGAGGTATGCTTCGCTACTCCGGTGTCCCAAAGAACATCCTGACGTGAACGACATGACAAC-3' JS523
T 3'-CAGGCAAGCAAGGTGCTAGAACGTCAAACCGACTCTTTTCTCAGAGTGGGTTGACGCTTCGTATGGGCCTGAATTCATTTAGTGAGTC-5' JS524
RNA 5'-UUUUAACGUUCCAC JS146 (bolded RNA nucleotides pair with template DNA oligonucleotide)
```

### Scaffolds in Fig 2d (Graph Z titration effect $Y_E$ activity) – 2023-01-04 expt

opsE+hp (bold DNA is arbitrary (not from UTR) used for reconstitution)

```
(((.....(((.....)))))) <-NusA stimulated pause hairpin
NT 5'-GTCCGTTTCGTTTCCACGATCTTGACGTTTGGCTGAGAAAAAGAGTCTCACCAACTGCGAAGCATACCCGGACTTAAGTAAATCACTCAG-3' JS521
T 3'-CAGGCAAGCAAGGTGCTAGAACGTCAAACCGACTCTTTTCTCAGAGTGGGTTGACGCTTCGTATGGGCCTGAATTCATTTAGTGAGTC-5' JS522
RNA 5'-UUUUAACGUUCCAC JS146 (bolded RNA nucleotides pair with template DNA oligonucleotide)
```

### Scaffolds in Supplementary Fig. 7a (Cog vs Non-cog $Y_X$ on ops<sub>A</sub>) – 2022-03-23 expt

opsA+hp (bold DNA is arbitrary (not from UTR) used for reconstitution)

```
(((.....(((.....)))))) <- Escape Hairpin
(((.....(((.....)))))) <-NusA stimulated hairpin
NT 5'-GTCCGTTTCGTTTCCACGTTTACGGTTTGAATGGGAAAAGATGTCTCGTCCAAACCGCGTAGCGCACCCGAAAGTAACCTCTCGACTTTG-3' JS553
T 3'-CAGGCAAGCAAGGTGCTAGAACGTCAAACCGACTCTTTTCTCAGAGCAGGTTTGGCGCATCGCGTGGGCTTCATTGGAGAGCTGAAAC-5' JS554
RNA 5'-UUUUAACGUUCCAC JS146 (bolded RNA nucleotides pair with template DNA oligonucleotide)
```

### Scaffolds in Supplementary Fig. 7b (ops<sub>E</sub>→<sub>A</sub> mutants) (2022-05-12 and 2022-06-02 expts)

opsE+hp (Pause Cycling Observed) (bold DNA is arbitrary (not from UTR) used for reconstitution)

```
...(((.....(((.....))))))..... < Does not form bc structure below
forms first
(((.....(((.....)))))) <-NusA stimulated hairpin
NT 5'-GTCCGTTTCGTTTCCACGATCTTGACGTTTGGCTGAGAAAAAGAGTCTCACCAACTGCGAAGCATACCCGGACTTAAGTAAATCACTCAG-3' JS521
T 3'-CAGGCAAGCAAGGTGCTAGAACGTCAAACCGACTCTTTTCTCAGAGTGGGTTGACGCTTCGTATGGGCCTGAATTCATTTAGTGAGTC-5' JS522
RNA 5'-UUUUAACGUUCCAC JS146 (bolded RNA nucleotides pair with template DNA oligonucleotide)
```

HP<sub>A</sub>[-10:-1]<sub>E</sub> (Pause Cycling Observed) (bold DNA is arbitrary (not from UTR) used for reconstitution)

```
((.....(((.....)))))) <-Escape Hairpin Disrupted
(((.....(((.....)))))) <-NusA stimulated hairpin
NT 5'-GTCCGTTTCGTTTCCACGTTTACGGTTTGAATGGGAAAAGAGTCTCGTCCAAACCTGCGAAGCATACCCGAAAGTAACCTCTCGACTTTG-3' JS555
T 3'-CAGGCAAGCAAGGTGCTAGAACGTCAAACCGACTCTTTTCTCAGAGCAGGTTTACGCTTCGTATGGGCCTTCATTGGAGAGCTGAAAC-5' JS556
RNA 5'-UUUUAACGUUCCAC JS146 (bolded RNA nucleotides pair with template DNA oligonucleotide)
```

opsE+hp -6 mut (Pause Cycling Observed) (bold DNA is arbitrary (not from UTR) used for reconstitution)

```
...(((.....(((.....))))))..... < Does not form bc structure below
forms first
(((.....(((.....)))))) <-NusA stimulated hairpin
NT 5'-GTCCGTTTCGTTTCCACGATCTTGACGTTTGGCTGAGAAAAAGAGTCTCACCAACTGCGTAGCATACCCGGACTTAAGTAAATCACTCAG-3' JS591
T 3'-CAGGCAAGCAAGGTGCTAGAACGTCAAACCGACTCTTTTCTCAGAGTGGGTTGACGCTTCGTATGGGCCTGAATTCATTTAGTGAGTC-5' JS592
RNA 5'-UUUUAACGUUCCAC JS146 (bolded RNA nucleotides pair with template DNA oligonucleotide)
```

HP<sub>E</sub>[-10:-1]<sub>A</sub> (Pause Cycling Observed) (bold DNA is arbitrary (not from UTR) used for reconstitution)

```
...(((.....(((.....))))))..... <-NusA stimulated hairpin
NT 5'-GTCCGTTTCGTTTCCACGATCTTGACGTTTGGCTGAGAAAAAGAGTCTCACCAACCGCGTAGCGCACCCGGACTTAAGTAAATCACTCAG-3' JS557
T 3'-CAGGCAAGCAAGGTGCTAGAACGTCAAACCGACTCTTTTCTCAGAGTGGGTTGACGCTTCGTATGGGCCTGAATTCATTTAGTGAGTC-5' JS558
RNA 5'-UUUUAACGUUCCAC JS146 (bolded RNA nucleotides pair with template DNA oligonucleotide)
```

opsA+hp (NO Pause Cycling) (bold DNA is arbitrary (not from UTR) used for reconstitution)

```
(((.....(((.....)))))) <- Escape Hairpin
(((.....(((.....)))))) <-NusA stimulated hairpin
```

### Scaffolds in Fig 4ab – Antisense DNA expts ops<sub>E</sub>

(bold DNA is arbitrary (not from UTR) used for reconstitution)

(bold DNA is arbitrary (not from UTR) used for reconstitution)

## **Scaffolds in Supplementary Fig. 10a**

### **Truncated scaffold for testing ops<sub>E</sub> without pause hairpin**

5' -GAGAAAAAGAGTCTCACCCAA**CTGCGAAGCATA**CCCGGACTTAAGTAAATCACTCAGGAA-3' **JS156**  
3' -CTCTTTTCTCAGAGTGGGTTGACGCTTCGTATGGGCCTGAATTCATTTAGTGAGTCCTT-5' **JS157**  
CUCACCCA **JS473**  
RNA5' -UUUUUUA

## **Scaffolds in Supplementary Fig. 10b – ntDNA hp mutations (red)**

### **opsE (WT)**

5' -GAGAAAAAGAGTCTCACCCAA**CTGCGAAGCATA**CCCGGACTTAAGTAAATCACTCAGGAA-3' **JS156**  
3' -CTCTTTTCTCAGAGTGGGTTGACGCTTCGTATGGGCCTGAATTCATTTAGTGAGTCCTT-5' **JS157**  
CUCACCCA **JS473**  
RNA5' -UUUUUUA

### **opsE\_mut1(opsA/B-mimic-1(AT→GC))**

5' -GAGAAAAAGAGTCTCACCCAA**CTGCGAAGCga**CCCGGACTTAAGTAAATCACTCAGGAA-3' **JS467**  
3' -CTCTTTTCTCAGAGTGGGTTGACGCTTCG**cg**TGGGCCTGAATTCATTTAGTGAGTCCTT-5' **JS468**  
CUCACCCA **JS473**  
RNA5' -UUUUUUA

### **opsE\_mut2(opsA/B-mimic-2(T→C))**

5' -GAGAAAAAGAGTCTCACCCAA**CgGCGAAGCATA**CCCGGACTTAAGTAAATCACTCAGGAA-3' **JS469**  
3' -CTCTTTTCTCAGAGTGGGTTG**g**CGCTTCGTATGGGCCTGAATTCATTTAGTGAGTCCTT-5' **JS470**  
CUCACCCA **JS473**  
RNA5' -UUUUUUA

### **opsE\_mut3(opsA-mimic-3(A→T))**

5' -GAGAAAAAGAGTCTCACCCAA**CTGCGtAGCATA**CCCGGACTTAAGTAAATCACTCAGGAA-3' **JS471**  
3' -CTCTTTTCTCAGAGTGGGTTGACGCa**T**CGTATGGGCCTGAATTCATTTAGTGAGTCCTT-5' **JS472**  
CUCACCCA **JS473**  
RNA5' -UUUUUUA

### **Scaffolds in Fig 5c,d – opsB to E mutants (-PH only) 2023-04-05 expt**

Bold-underlined regions represent upstream DNA regions of interest. Substitutions are red, bold, lowercase, underlined.

#### **opsB-hp (reconstitute -3)**

```
(((((.((((.....)))))).))))<-NusA stimulated hairpin
NT 5'-TTTGAAAGAGAAAAGATGTCTCGTTCAAAACCGCGAAGCGCACCCGAAATAAGGAAAAATTCCTCAAG-3' JS654
T 3'-AAACTTTCTCTTTCTACAGAGCAAGTTTGGCGCTTCGCGTGGGCTTTATTTCTTTTAAAGGGGTC-5' JS655
                                CCGCGAAGC JS666
RNA5'-UUUUUU
```

#### **opsB -36-34 mut to opsE**

```
(((((.((((.....)))))).))))<-NusA stimulated hairpin
NT 5'-TTTGggcGAGAAAAGATGTCTCGTTCAAAACCGCGAAGCGCACCCGAAATAAGGAAAAATTCCTCAAG-3' JS660
T 3'-AAACccgCTCTTTCTACAGAGCAAGTTTGGCGCTTCGCGTGGGCTTTATTTCTTTTAAAGGGGTC-5' JS661
                                CCGCGAAGC JS666
RNA5'-UUUUUU
```

#### **opsB -26-24 mut to opsE**

```
(((((.((((.....)))))).))))<-NusA stimulated hairpin
NT 5'-TTTGAAAGAGAAAAAgGTCTCGTTCAAAACCGCGAAGCGCACCCGAAATAAGGAAAAATTCCTCAAG-3' JS662
T 3'-AAACTTTCTCTTTTcCAGAGCAAGTTTGGCGCTTCGCGTGGGCTTTATTTCTTTTAAAGGGGTC-5' JS663
                                CCGCGAAGC JS666
RNA5'-UUUUUU
```

#### **opsB -18-16 mut to opsE**

```
(((((.((((.....)))))).))))<-NusA stimulated hairpin
NT 5'-TTTGAAAGAGAAAAgacGTCTCcaCAAAACCGCGAAGCGCACCCGAAATAAGGAAAAATTCCTCAAG-3' JS664
T 3'-AAACTTTCTCTTTCTACAGAGgtgGTTTGGCGCTTCGCGTGGGCTTTATTTCTTTTAAAGGGGTC-5' JS665
                                CCGCGAAGC JS666
RNA5'-UUUUUU
```

### **Scaffolds in Fig 5d (+PH only) – compares opsB-escape duplex to scaffold “-10:1, -14 ins opsB”**

Bold DNA is arbitrary (not from UTR) used for reconstitution. Bolded RNA nucleotides pair with template DNA oligonucleotide.

#### **opsE+hp > -10:1, -14 ins**

```
(((((.((((.....)))))).))))<-NusA stimulated hairpin
NT 5'-GTCCGTTCGTTTCCACGATCTTGCAGTTTGGCTGAAGAAAGAGTCTCACCCAAACCGCGAAGCGCACCCGGACTTAAGTAAATCACTCA-3' JS597
T 3'-CAGGCAAGCAAGGTGCTAGAACGTCAAACCGACTCTTTTCTCAGAGTGGGTTTGGCGCTTCGCGTGGGCCTGAATTCATTAGTGAGT-5' JS598
RNA 5'-UUUUAACGUUCCAC JS146
```

#### **opsB-escape duplex**

```
(((((.((((.....)))))).))))<-NusA stimulated hairpin
NT 5'-GTCCGTTCGTTTCCACGATCTTGCAGTTTGAAAGAGAAAGATGTCTCGTTCAAACCGCGAAGCGCACCCGAAATAAGGAAAAATTCCTCAAG-3' JS674
T 3'-CAGGCAAGCAAGGTGCTAGAACGTCAAACCTTCTCTTTCTACAGAGCAAGTTGGCGCTTCGCGTGGGCTTTATTTCTTTTAAAGGG-5' JS675
RNA 5'-UUUUAACGUUCCAC JS146
```

Bold DNA is arbitrary (not from UTR) used for reconstitution. Bolded RNA nucleotides pair with template DNA oligonucleotide.

(((((((.(((((.)))))).))))))<-NusA stimulated hairpin

**NT** 5'-**GTCCGTTTCGTTTCCACG**ATCTTGCAGTTTGGCTGAGAAAAAGAGTCTCACCCAAACCGCGAAGCGCACCCGGACTTAAGTAAATCACTCA-3' **JS597**  
**T** 3'-**CAGGCAAGCAAAGGTGCT**AGAACGTCAAACCGACTCTTTTCTCAGAGTGGGTTGGCGCTTCGCGTGGGCCTGAATTCATTTAGTGAGT-5' **JS598**  
**RNA** 5'-UUUUAAACGUUCCAC **JS146**

## opsB+hp

(((((((.(((((.)))))).))))))<-Escape Hairpin  
 ((((((((((.(((((.)))))).)))))).))))<-NusA stimulated hairpin

**NT** 5'-**GTCCGTTTCGTTTCCACGA**ATTTGACGGTTTGAAAGAGAAAAGATGTCTCGTTCAAACCGCGAAGCGCACCCGAAATAAAGGAAAATTTCC-3' **JS551**  
**T** 3'-**CAGGCAAGCAAAGGTGCTT**AAACTGCCAAACTTTCTCTTTCTACAGAGCAAGTTTGGCGCTTCGCGTGGGCTTTATTTCTTTTAAAGG-5' **JS552**  
**RNA** 5'-UUUUAAACGUUCCAC **JS146**



## Scaffolds in Fig 6, Supplementary Fig. 12, Supplementary Fig. 13 – Exo assay scaffolds

### opsE+hp—for exo footprinting w/ phosphorothioated NT DNA

```
(((((.((((.....)))))).))))<-NusA stimulated hairpin
NT 5'-TTGGCTGAGAAAAAGAGTCTCACCCTGCGAAGCATACCCGGACTTAAGTAAAT*C*A*T-3' JS612 * = phosphorothioate
T 3'-AACCGACTCTTTTCTCAGAGTGGGTGACGCTTCGTATGGGCTGAATTCATTAGTGA-5' JS611
GCGAAGCAU JS457
RNA 5'-gcuaucuaaga
```

Below: Bolded upstream DNA are regions of interest. Bold, red, lowercase, and underlined are substitutions made.

### opsB+hp—for exo footprinting w/ phosphorothioated NT DNA

```
(((((.((((.....)))))).))))<-NusA stimulated hairpin
NT 5'-TTTGAAAAGAGAAAAGATGTCTCGTTCAAACCGCGAAGCGCACCCGAAATAAGGAA*A*A*T-3' JS638 * = phosphorothioate
T 3'-AAACTTTCTCTTTTCTACAGAGCAAGTTTGGCGCTTCGCGTGGGCTTTATTTCCCTTTAA-5' JS639
GCGAAGCGC JS640
RNA 5'-gguaauggu
```

### opsB+hp[-36:-34]+[-26:-24] mut to opsE—for exo footprinting

```
(((((.((((.....)))))).))))<-NusA stimulated hairpin
NT 5'-TTTGAggcGAGAAAAAgGTCTCGTTCAAACCGCGAAGCGCACCCGAAATAAGGAA*A*A*T-3' JS710 * = phosphorothioate
T 3'-AAACccgCTCTTTTtTcCAGAGCAAGTTTGGCGCTTCGCGTGGGCTTTATTTCCCTTTAA-5' JS711
GCGAAGCGC JS640
RNA 5'-gguaauggugg
```

### opsB+hp[-18:-16] mut to opsE—for exo footprinting

```
(((((.((((.....)))))).))))<-NusA stimulated hairpin
NT 5'-TTTGAAAAGAGAAAAGATGTCTCcacCAACCGCGAAGCGCACCCGAAATAAGGAA*A*A*T-3' JS712 * = phosphorothioate
T 3'-AAACTTTCTCTTTTCTACAGAGgtgGTTTGGCGCTTCGCGTGGGCTTTATTTCCCTTTAA-5' JS713
GCGAAGCGC JS640
RNA 5'-gguaauggug
```

## Supplementary References

- 1 Krinos, C. M. *et al.* Extensive surface diversity of a commensal microorganism by multiple DNA inversions. *Nature* **414**, 555-558 (2001). <https://doi.org:10.1038/35107092>
- 2 Coyne, M. J., Weinacht, K. G., Krinos, C. M. & Comstock, L. E. Mpi recombinase globally modulates the surface architecture of a human commensal bacterium. *Proc. Natl. Acad. Sci. U. S. A.* **100**, 10446-10451 (2003). <https://doi.org:10.1073/pnas.1832655100>
- 3 Chatzidaki-Livanis, M., Weinacht, K. G. & Comstock, L. E. Trans locus inhibitors limit concomitant polysaccharide synthesis in the human gut symbiont *Bacteroides fragilis*. *Proc. Natl. Acad. Sci. U. S. A.* **107**, 11976-11980 (2010). <https://doi.org:10.1073/pnas.1005039107>
- 4 Zuber, P. K. *et al.* Concerted transformation of a hyper-paused transcription complex and its reinforcing protein. *Nature Comm.* **15**, 3040 (2024). <https://doi.org:10.1038/s41467-024-47368-4>
- 5 Kang, J. Y. *et al.* Structural basis for transcript elongation control by NusG/RfaH universal regulators. *Cell* **173**, 1650-1662.e1614 (2018).
- 6 Zuber, P. K. *et al.* The universally-conserved transcription factor RfaH is recruited to a hairpin structure of the non-template DNA strand. *eLife* **7** (2018). <https://doi.org:10.7554/eLife.36349>
- 7 Abramson, J. *et al.* Accurate structure prediction of biomolecular interactions with AlphaFold 3. *Nature* (2024). <https://doi.org:10.1038/s41586-024-07487-w>
- 8 Artsimovitch, I. & Landick, R. Pausing by bacterial RNA polymerase is mediated by mechanistically distinct classes of signals. *Proc. Natl. Acad. Sci. U. S. A.* **97**, 7090-7095 (2000).
- 9 Burns, C. M., Richardson, L. V. & Richardson, J. P. Combinatorial effects of NusA and NusG on transcription elongation and Rho-dependent termination in *Escherichia coli*. *J. Mol. Biol.* **278**, 307-316 (1998).
- 10 Yakhnin, A. V. *et al.* NusG controls transcription pausing and RNA polymerase translocation throughout the *Bacillus subtilis* genome. *Proc. Natl. Acad. Sci. U. S. A.* **117**, 21628-21636 (2020). <https://doi.org:10.1073/pnas.2006873117>
- 11 Yakhnin, A. V., Murakami, K. S. & Babitzke, P. NusG Is a Sequence-specific RNA Polymerase Pause Factor That Binds to the Non-template DNA within the Paused Transcription Bubble. *J. Biol. Chem.* **291**, 5299-5308 (2016). <https://doi.org:10.1074/jbc.M115.704189>
- 12 Elghondakly, A., Wu, C. H., Klupt, S., Goodson, J. & Winkler, W. C. A NusG Specialized Paralog That Exhibits Specific, High-Affinity RNA-Binding Activity. *J. Mol. Biol.* **433**, 167100 (2021). <https://doi.org:10.1016/j.jmb.2021.167100>
